# Supplementary material
Source: PubMed Central journal article supplement (PMC3967758)
Supplement: NIHMS433009-supplement-1_si_001.pdf [file NIHMS433009-supplement-1_si_001.pdf]

# LiCABEDS II. Modeling Ligand Selectivity for G-protein Coupled Cannabinoid Receptors

Chao Ma<sup>1,2</sup>, Lirong Wang<sup>1,3,4</sup>, Peng Yang<sup>1,3,4</sup>, Kyaw Z. Myint<sup>1,2</sup>, and Xiang-Qun Xie<sup>1,2,3,4\*</sup>

<sup>1</sup>Department of Pharmaceutical Sciences, School of Pharmacy, Computational Chemical Genomics Screening Center, <sup>2</sup>Department of Computational and Systems Biology, <sup>3</sup>Center for Chemical Methodologies & Library Development (UPCMLD), <sup>4</sup>Drug Discovery Institute, University of Pittsburgh, Pittsburgh, PA 15260, USA

\*Corresponding author

Author to whom correspondence should be addressed:

Xiang-Qun (Sean) Xie, email: [xix15@pitt.edu](mailto:xix15@pitt.edu); Tel.: +1-412-383-5276; Fax: +1-412-383-7436

**Keywords:** LiCABEDS, Ensemble Learning, Molecular Fingerprint, Selectivity, Cannabinoid Receptor.

# Supporting Information

## PART 1

This part lists the compound structures, their binding affinities for both CB1 or CB2 receptors, and detailed assay protocol. Table S1 summarizes 12 novel compound structures and binding affinities. These compounds are derived from the scaffold shown in Figure S1. Table S2 shows the structures, binding affinities and predicted CB2 selectivity of another 26 compounds. These novel compounds serve as external testing set to assess the performance of selectivity prediction models.

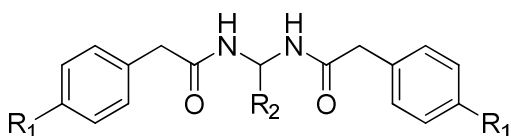

Figure S1: the scaffold of testing compounds summarized in Table S1

Table S1: the first compound collection for model validation

| No.                 | Compd  | R <sub>1</sub> | R <sub>2</sub>                                                                          | MW     | cLog P | K <sub>i</sub> (CB <sub>2</sub> ), nM <sup>b, c</sup> | K <sub>i</sub> (CB <sub>1</sub> ), nM <sup>a, d</sup> | SI <sup>e</sup> |
|---------------------|--------|----------------|-----------------------------------------------------------------------------------------|--------|--------|-------------------------------------------------------|-------------------------------------------------------|-----------------|
| 1                   | PY1-37 | H              | C <sub>6</sub> H <sub>5</sub> CH <sub>2</sub>                                           | 372.46 | 3.99   | NB                                                    | NT                                                    |                 |
| 2                   | PY1-38 | H              | C <sub>6</sub> H <sub>5</sub> CH <sub>2</sub> CH <sub>2</sub>                           | 386.49 | 4.44   | 9,319                                                 | NT                                                    |                 |
| 3                   | PY1-39 | H              | C <sub>6</sub> H <sub>5</sub> CH=CH                                                     | 384.47 | 4.54   | 5,683                                                 | NT                                                    |                 |
| 4                   | PY1-42 | H              | <i>p</i> -i-C <sub>3</sub> H <sub>7</sub> O-C <sub>6</sub> H <sub>4</sub>               | 416.51 | 4.55   | 313                                                   | > 20,000                                              | > 64            |
| 5                   | PY1-45 | H              | <i>p</i> -Br-C <sub>6</sub> H <sub>4</sub>                                              | 437.33 | 4.70   | 2,226                                                 | NT                                                    |                 |
| 6                   | PY1-48 | H              | <i>p</i> -C <sub>2</sub> H <sub>5</sub> O-C <sub>6</sub> H <sub>4</sub>                 | 402.49 | 4.13   | 1,500                                                 | NT                                                    |                 |
| 7                   | PY1-49 | H              | n-C <sub>4</sub> H <sub>9</sub>                                                         | 338.44 | 3.75   | 35,970                                                | NT                                                    |                 |
| 8                   | PY1-50 | H              | n-C <sub>5</sub> H <sub>11</sub>                                                        | 352.47 | 4.19   | 18,200                                                | NT                                                    |                 |
| 9                   | PY1-57 | H              | 2-fluoro-4-methoxyphenyl                                                                | 406.45 | 3.93   | 1071                                                  | NT                                                    |                 |
| 10                  | PY1-58 | H              | <i>m</i> -F-C <sub>6</sub> H <sub>4</sub>                                               | 376.42 | 4.08   | 12,670                                                | NT                                                    |                 |
| 11                  | PY1-61 | H              | <i>p</i> -(C <sub>2</sub> H <sub>5</sub> ) <sub>2</sub> N-C <sub>6</sub> H <sub>4</sub> | 429.55 | 4.76   | 64                                                    | > 20,000                                              | > 313           |
| 12                  | PY1-63 | H              | <i>p</i> -i-C <sub>3</sub> H <sub>7</sub> -C <sub>6</sub> H <sub>4</sub>                | 400.51 | 5.18   | 85                                                    | > 20,000                                              | > 235           |
| SR1 <sup>f, g</sup> |        |                |                                                                                         |        | 2.1    | NT                                                    |                                                       |                 |
| SR2 <sup>f, h</sup> |        |                |                                                                                         |        | NT     | 10.6                                                  |                                                       |                 |

<sup>a, b</sup> Binding affinities of compounds for CB<sub>1</sub> and CB<sub>2</sub> receptor were evaluated using [<sup>3</sup>H]-CP-55,940 radioligand competition binding assay. <sup>c</sup> NB no binding, K<sub>i</sub> > 20,000 nM. <sup>d</sup> NT = not tested. <sup>e</sup> SI: selectivity index for CB<sub>2</sub>, calculated as K<sub>i</sub>(CB<sub>1</sub>)/K<sub>i</sub>(CB<sub>2</sub>) ratio. <sup>f</sup> The binding affinities of reference compounds were evaluated in parallel with compounds 1-12 under the same conditions. <sup>g</sup> CB<sub>2</sub> reference compound SR144528 (SR1). <sup>h</sup> CB<sub>1</sub> reference compound SR 141716 (SR2).

# Supporting Information

Table S2: the second compound collection for model validation

| Compound Structure                                                                  | Name   | K <sub>i</sub> nM (CB <sub>2</sub> ) | K <sub>i</sub> nM (CB <sub>1</sub> ) | CB2 Selectivity | Prediction    |
|-------------------------------------------------------------------------------------|--------|--------------------------------------|--------------------------------------|-----------------|---------------|
| 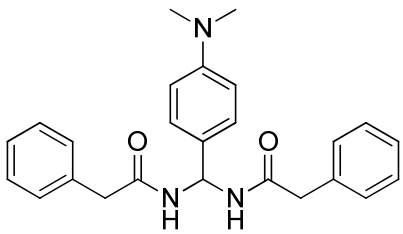   | XIE95  | 709                                  | NB                                   | Selective       | Non-selective |
|    | HC1-9  | 1223                                 | NB                                   | Non-selective   | Non-selective |
|   | HC1-11 | NB                                   | NB                                   | Non-selective   | Non-selective |
|  | HC1-13 | 188                                  | 9.1                                  | Non-selective   | Non-selective |
|  | HC1-12 | 1225                                 | 95.84                                | Non-selective   | Non-selective |

# Supporting Information

|                                                                                     |        |      |       |               |               |
|-------------------------------------------------------------------------------------|--------|------|-------|---------------|---------------|
| 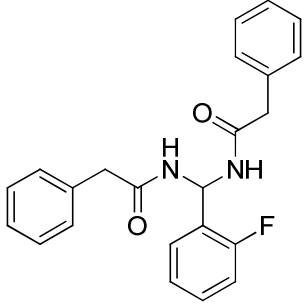   | HC1-16 | 5237 | 2     | Non-selective | Non-selective |
|    | HC1-20 | NB   | 18.47 | Non-selective | Non-selective |
|   | HC1-23 | 362  | NB    | Non-selective | Non-selective |
|  | HC1-24 | 434  | 109   | Non-selective | Non-selective |
|  | HC1-25 | NB   | NB    | Non-selective | Non-selective |

# Supporting Information

|  |        |      |     |               |               |
|--|--------|------|-----|---------------|---------------|
|  | HC1-26 | NB   | 7.7 | Non-selective | Non-selective |
|  | HC1-27 | 516  | NB  | Selective     | Selective     |
|  | HC1-28 | 4872 | NB  | Non-selective | Non-selective |
|  | HC1-29 | 5166 | NB  | Non-selective | Non-selective |
|  | HC1-33 | NB   | NB  | Non-selective | Non-selective |
|  | HC1-35 | 1531 | NB  | Non-selective | Non-selective |

# Supporting Information

|                                                                                     |        |      |    |               |               |
|-------------------------------------------------------------------------------------|--------|------|----|---------------|---------------|
| 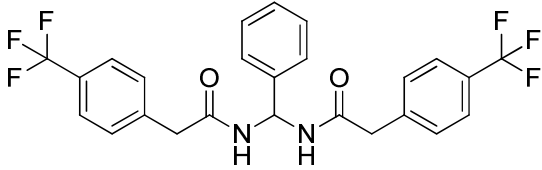   | HC1-37 | NB   | NB | Non-selective | Non-selective |
|    | HC1-38 | NB   | NB | Non-selective | Non-selective |
|    | HC1-39 | NB   | NB | Non-selective | Non-selective |
|   | HC1-40 | 1560 | NB | Non-selective | Non-selective |
|  | PY1-66 | 347  | NB | Selective     | Non-selective |

# Supporting Information

|                                                                                     |          |      |    |               |               |
|-------------------------------------------------------------------------------------|----------|------|----|---------------|---------------|
| 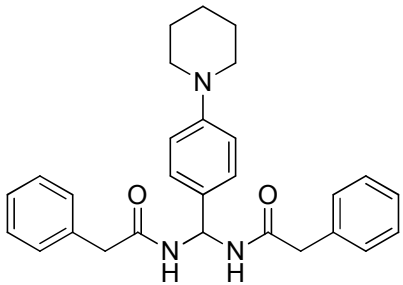   | PY1-67   | 703  | NB | Selective     | Non-selective |
|    | PY1-124  | 3553 | NB | Non-selective | Selective     |
|   | PY1-143  | 587  | NB | Selective     | Selective     |
|  | PY1-144B | 25.7 | NB | Selective     | Selective     |
|  | PY1-148  | 182  | NB | Selective     | Selective     |

## Supporting Information

**Radioligand Competition Binding Assays.** CB ligand competition binding assay was carried out as described previously<sup>1</sup>. Briefly, non-radioactive (or cold) ligands (PAM derivatives and reference ligands) were diluted in binding buffer (50 mM Tris-HCl (pH 7.4), 5 mM MgCl<sub>2</sub>, 2.5 mM EGTA and 0.1% (w/v) fatty acid free BSA), supplemented with 10% dimethyl sulfoxide and 0.4% methyl cellulose. Each assay plate well contained a total of 200  $\mu$ L of reaction mixture comprised of 5  $\mu$ g of CB<sub>1</sub> (or CB<sub>2</sub>) membrane protein, labeled [<sup>3</sup>H]-CP-55,940 ligand at a final concentration of 3 nM and the unlabeled ligand at its varying dilutions as stated above. Plates were incubated at 30 °C for 1 h with gentle shaking. The reaction was terminated by rapid filtration through Unifilter GF/C filter plates using a Unifilter Cell Harvester (PerkinElmer). After the plate was allowed to dry overnight, 30  $\mu$ L MicroScint-0 cocktail (PerkinElmer) was added to each well and the radioactivity was counted by using a PerkinElmer TopCounter. Data from these assays were analyzed using GraphPad Prism 5.0 Software. All assays were performed in duplicate and data points represented as mean $\pm$ S.E.M. Bound radioactivity was analyzed for  $K_i$  values using non-linear regression analysis by GraphPad Prism 5.0 software.

The saturation binding of [<sup>3</sup>H]-CP-55,940 to the membrane proteins was performed as described previously<sup>2</sup>. Briefly, the CB<sub>1</sub> (or CB<sub>2</sub>) membrane fractions (5  $\mu$ g) were incubated with increasing concentrations of [<sup>3</sup>H]-CP-55,940 (0.05-4 nM) in 96-well plates at 30 °C with slow shaking for 1 h. The incubation buffer was composed of 50 mM Tris-HCl (pH 7.4), 5 mM MgCl<sub>2</sub>, 2.5 mM EGTA and 0.1% (w/v) fatty acid free BSA. Ligand was diluted in incubation buffer supplemented with 10% dimethyl sulfoxide and 0.4% methyl cellulose. Non-specific binding was determined in the presence of 1:1000 unlabeled CP-55,940 (5,000 nM) in excess. The reaction was terminated and the radioactivity was counted as stated above. The difference between total and nonspecific binding equals the receptor specific binding. Non-linear regression analysis revealed the receptor density ( $B_{max}$ ) and the equilibrium dissociation constant ( $K_d$ ) values of [<sup>3</sup>H]-CP-55,940 for the CB<sub>2</sub> receptor.



## Supporting Information

1. Gertsch, J.; Leonti, M.; Raduner, S.; Racz, I.; Chen, J. Z.; Xie, X. Q.; Altmann, K. H.; Karsak, M.; Zimmer, A. Beta-caryophyllene is a dietary cannabinoid. *Proc Natl Acad Sci U S A* **2008**, 105, 9099-104.
2. Zhang, Y.; Xie, Z.; Wang, L.; Schreiter, B.; Lazo, J. S.; Gertsch, J.; Xie, X. Q. Mutagenesis and computer modeling studies of a GPCR conserved residue W5.43(194) in ligand recognition and signal transduction for CB2 receptor. *Int Immunopharmacol* **2011**, 11, 1303-10.

## Supporting Information

### ***PART 2***

The structures and bioactivity information of all annotated cannabinoid ligands involved in this study are listed in the following table. There are totally 703 cannabinoid ligands, including 147 CB2 selective compounds and 149 CB1 selective compounds. The remaining 407 compounds are neither CB1 selective nor CB2 selective. Note that CB1 non-selective compounds include 147 CB2 selective and 407 non-selective compounds. The same analogy applies to the CB2 non-selective. The table below lists the structures of these compounds in SMILES format, CAS index number, corresponding  $K_i$  values for CB1 and CB2 receptors, and reference information from which  $K_i$  values were extracted. The unit of  $K_i$  values is nM. CAS index number can be used to locate the structure information in Science Finder search engine (SciFinder<sup>®</sup>), while reference can be retrieved by reference index. These data have been deposited into our online compound repository, [www.cbligand.org](http://www.cbligand.org).

## Supporting Information

Table S3: list of annotated CB ligands

| SMILES Structure                                                               | CAS Number   | Ki CB1 | Ki CB2 | Reference    |
|--------------------------------------------------------------------------------|--------------|--------|--------|--------------|
| <chem>CCCCCCC(C)(C)c1cccc(OCC/C=C/C/C=C/CCCC(=O)N[C@H](C)CO)c1</chem>          | 1000174-11-7 | 8.55   | 21.48  | 2007:1195242 |
| <chem>O=C(N[C@H](C)CO)CCC/C=C\C/C=C\C\CCOc1ccc(C(C)(C)CCCCC)cc1</chem>         | 1000174-12-8 | 194.85 | 78.22  | 2007:1195242 |
| <chem>O=C(N[C@H](C)CO)CCC/C=C\C/C=C\C/C=C\Cc1cccc1C(C)(C)CCCCC</chem>          | 1000174-13-9 | 86.33  | 257.33 | 2007:1195242 |
| <chem>O=C(N[C@H](C)CO)CCC/C=C\C/C=C\C\CCOc1cccc(C(C)(C)CCCCO)c1</chem>         | 1000174-14-0 | 78.97  | 10.9   | 2007:1195242 |
| <chem>O=C(N[C@H](C)CO)CCC/C=C\C/C=C\C\CCOc1cccc(C(C)(C)CCCCBr)c1</chem>        | 1000174-15-1 | 2.74   | 2.52   | 2007:1195242 |
| <chem>O=C(CCC/C=C\C/C=C\C/C=C\C\CCOc1ccc(C(C)(CCCCC)C)ccc1)N[C@@H](CO)C</chem> | 1000174-18-4 | 131.33 | 189    | 2007:1195242 |
| <chem>O=C(c1c(=O)c2c(n(c1)CCN1CCOCC1)nc(cc2)N(C)C)NC1CCCC1</chem>              | 1000376-74-8 | 5600   | 94     | 2007:1279246 |
| <chem>O=C(c1c(=O)c2c(n(c1)Cc1cccc1)cc(cc2)OC)NC1CCCC1</chem>                   | 1000376-77-1 | 170    | 79     | 2007:1279246 |
| <chem>O=C(c1c(=O)c2c(n(c1)CCN1CCOCC1)cc(cc2)OC)NC1CCCC1</chem>                 | 1000376-78-2 | 2920   | 79     | 2007:1279246 |
| <chem>O=C(c1c(=O)c2c(n(c1)Cc1cccc1)cccc2)NC1CCCC1</chem>                       | 1000376-79-3 | 17     | 6.4    | 2007:1279246 |
| <chem>O=C(c1c(=O)c2c(n(c1)CCN1CCOCC1)cccc2)NC1CCCC1</chem>                     | 1000376-80-6 | 290    | 28     | 2007:1279246 |
| <chem>O=C(c1n(Cc2cccc2)c2c(ccc(N)n2)c(=O)c1)NC1CCCC1</chem>                    | 1000376-84-0 | 5600   | 7900   | 2007:1279246 |
| <chem>O=c1n(C2CCCC2)nc2c1n(Cc1cccc1)c1c2cccc1</chem>                           | 1000376-85-1 | 620    | 790    | 2007:1279246 |
| <chem>O=c1n(C2CCCC2)nc2c1n(Cc1cccc1)c1c2ccc(Cl)c1</chem>                       | 1000376-86-2 | 560    | 1640   | 2007:1279246 |
| <chem>O=c1n(C2CCCC2)nc2c1n(CCN1CCOCC1)c1c2cccc1</chem>                         | 1000376-87-3 | 5600   | 7900   | 2007:1279246 |
| <chem>O=c1n(c2cccc2)nc2c1n(CCN1CCOCC1)c1c2cccc1</chem>                         | 1000376-88-4 | 2800   | 2280   | 2007:1279246 |
| <chem>Oc1c2c3cc(O)ccc3C(C)(C)Oc2cc(C(C)(C)CCCCC)c1</chem>                      | 1002320-51-5 | 2.6    | 4.8    | 2007:1374805 |
| <chem>CC1=CC[C@H]2[C@H](C1)c1c(OC2(C)C)cc(cc1)C(C)(C)CCCCC</chem>              | 105823-04-9  | 23     | 2.9    | 1996:544126  |
| <chem>CC/C=C\C/C=C\C/C=C\C\CCCCCCC(=O)NCCc1ccc(O)c(O)c1</chem>                 | 105955-13-3  | 3920   | 12900  | 2000:819929  |
| <chem>OCC1=CC[C@H]2[C@H](C1)c1c(OC2(C)C)cc(cc1O)C(C)(C)CCCCC</chem>            | 112830-95-2  | 0.73   | 0.52   | 1996:544126  |
| <chem>OCC1=CC[C@H]2[C@H](C1)c1c(OC2(C)C)cc(cc1O)C(C)(C)CCCCC</chem>            | 112924-45-5  | 1990   | 10000  | 1997:406316  |
| <chem>O=C(c1c2cccc2n(C[C@H]2N(C)CCCC2)c1)c1cccc2c1cccc2</chem>                 | 137642-54-7  | 0.75   | 1.91   | 2005:980153  |
| <chem>Oc1c2[C@@H]3[C@H](CC=C(C)C3)C(C)(C)Oc2cc(CCCCF)c1</chem>                 | 138886-82-5  | 57.5   | 8.71   | 2000:338367  |
| <chem>Oc1c2[C@@H]3[C@H](CC=C(C)C3)C(C)(C)Oc2cc(CCCCC(F)F)c1</chem>             | 138886-83-6  | 19.95  | 30.2   | 2000:338367  |
| <chem>Oc1cc(CCCCC)cc(O)c1[C@@H]1C=C(C)CC[C@H]1C(=C)C</chem>                    | 13956-29-1   | 4365.2 | 2884   | 2000:338367  |
| <chem>OC[C@@H]1C[C@H]2[C@H](CC1)C(Oc1c2c(O)cc(C(C)(C)CCCCC)c1)(C)C</chem>      | 140835-14-9  | 2.3    | 2.3    | 1998:546552  |
| <chem>CCCCCCCCCCCCC(=O)NCCO</chem>                                             | 142-58-5     | 1000   | 1000   | 1999:584470  |

## Supporting Information

|                                                                  |             |        |        |             |
|------------------------------------------------------------------|-------------|--------|--------|-------------|
| CCCCCCCCCCCC(=O)NCCO                                             | 142-78-9    | 1000   | 1000   | 1999:584470 |
| CCCCC/C=C\C/C=C\C/C=C\C/C=C\C\CCCC(=O)N[C@H](C)CO                | 150314-39-9 | 138    | 398.1  | 2000:338367 |
| O=C(c1c2cccc2n(CCCC)c1C)c1cccc2c1cccc2                           | 155471-09-3 | 22     | 4.29   | 2000:554114 |
| O=C(c1c2cccc2n(CCCCC)c1C)c1cccc2c1cccc2                          | 155471-11-7 | 48     | 4.02   | 2000:554114 |
| O=C(c1c2cccc2n(CCCCCC)c1C)c1cccc2c1cccc2                         | 155471-12-8 | 311    | 141    | 2000:554114 |
| CCCCC/C=C\C/C=C\C/C=C\C/C=C\C\CCCC(=O)NC[C@H](O)C                | 157182-47-3 | 12.5   | 20     | 1998:635184 |
| CCCCC/C=C\C/C=C\C/C=C\C/C=C\C\CCCC(=O)NC[C@H](O)C                | 157182-48-4 | 5.6    | 12     | 1998:635184 |
| CCCCC/C=C\C/C=C\C/C=C\C/C=C\C\CCCC(=O)N[C@H](C)CO                | 157182-50-8 | 195    | 83     | 1998:635184 |
| O=C(NN1CCCCC1)c1c(C)c(c2ccc(Cl)cc2)n(c2c(Cl)cc(Cl)cc2)n1         | 158681-13-1 | 12.3   | 707.9  | 2000:338367 |
| CCCCC/C=C\C/C=C\C/C=C\C/C=C\C\CCCC(=O)NCCOC                      | 158840-64-3 | 1819.7 | 446.7  | 2000:338367 |
| O=C(c1c(C)c(c2ccc(Cl)cc2)n(c2ccc(Cl)cc2Cl)n1)NC1CCCCC1           | 158940-64-8 | 2.46   | 228    | 2002:372410 |
| CCCCC/C=C\C[C@H](/C=C\C=C/C/C=C/C/CCCC(=O)NCCO)O                 | 161744-52-1 | 207    | 131    | 1998:486973 |
| N1(CCC2=C/C(=C\C3cccc4c3cccc4)/c3c2cccc3)CCOCC1                  | 161809-35-4 | 148    | 132    | 1998:762250 |
| CC1=C(c2c(/C/1=C/c1cccc3c1cccc3)cccc2)CCN1CCOCC1                 | 161809-36-5 | 1945   | 658    | 1998:762250 |
| CC1=C(c2c(/C/1=C/c1cccc3c1cccc3)cccc2)CCN1CCOCC1                 | 161809-41-2 | 2.89   | 2.05   | 1998:762250 |
| O=C(c1cccc2c1cccc2)c1ccn(CCCCC)c1                                | 162934-73-8 | 87.1   | 316.2  | 2000:338367 |
| O=C(c1c2ccc(l)cc2n(CCN2CCOCC2)c1C)c1ccc(OC)cc1                   | 164178-33-0 | 5152   | 31.2   | 1999:171151 |
| OC[C@]1(C)[C@H]2CC[C@H](CO)C[C@@H]2c2c(O)cc(C(C)(C)CCCCC)cc2O1   | 164228-44-8 | 1.9    | 1.4    | 1998:546552 |
| OCC[C@]1(C)[C@H]2CC[C@H](CO)C[C@@H]2c2c(O)cc(C(C)(C)CCCCC)cc2O1  | 164228-45-9 | 2.8    | 2.3    | 1998:546552 |
| OCCC[C@]1(C)[C@H]2CC[C@H](CO)C[C@@H]2c2c(O)cc(C(C)(C)CCCCC)cc2O1 | 164228-46-0 | 2.2    | 3.4    | 1998:546552 |
| CCCCC/C=C\C/C=C\C/C=C\C/C=C\C\CC[C@H](C)C(=O)NCCO                | 164228-50-6 | 45.8   | 3062   | 2001:466973 |
| CCCCC/C=C\C/C=C\C/C=C\C/C=C\C\CCC(C)(C)C(=O)NCCO                 | 164228-51-7 | 72.2   | 10000  | 2001:466973 |
| CCCCC/C=C\C/C=C\C/C=C\C/C=C\C\CC[C@H](C(C)C)C(=O)NCCO            | 164228-53-9 | 3981.1 | 5128.6 | 2000:338367 |
| CCCCC/C=C\C/C=C\C/C=C\C/C=C\C\CCCC(=O)N1CCOCC1                   | 166100-34-1 | 1148.2 | 537    | 2000:338367 |
| CCCCC/C=C\C/C=C\C/C=C\C/C=C\C\CC[C@H](C)C(=O)NCCF                | 166100-39-6 | 5.75   | 131.8  | 2000:338367 |
| O=C(c1c(C)c(c2ccc(Cl)cc2)n(c2ccc(Cl)cc2Cl)n1)NN1CCCCC1           | 168273-06-1 | 6.18   | 313    | 2002:372410 |
| CC1=CC[C@H]2[C@H](C1)c1c(OC2(C)C)cc(cc1OC)C(C)(C)CCCCC           | 174627-50-0 | 924    | 65     | 2006:156948 |
| C=C1C[C@H]2[C@H](CC1)C(Oc1c2c(OC)cc(C(C)(C)CCCCC)c1)(C)C         | 174627-56-6 | 529    | 35     | 2006:156948 |

# Supporting Information

|                                                                             |             |      |       |              |
|-----------------------------------------------------------------------------|-------------|------|-------|--------------|
| Oc1cc(C(C)(C)CCCCC)cc(O)c1c1cc(C)cc(C)c1                                    | 174627-58-8 | 79   | 2     | 2007:862454  |
| Oc1cc(C(C)(C)CCCCC)ccc1c1cc(C)cc(C)c1                                       | 174627-59-9 | 2.7  | 2.3   | 2007:652168  |
| N#Cc1ccc(C(=O)c2c3ccc(OC)cc3oc2c2ccc(OC)cc2)cc1                             | 176977-56-3 | 203  | 10000 | 1998:53483   |
| CCCCC/C=C\C/C=C\C/C=C\C/C=C\C\CCCC(=O)NCC#C                                 | 177037-50-2 | 10.8 | 290   | 1998:786633  |
| Oc1c2[C@@H]3[C@H](CC=C(C)C3)C(C)(C)Oc2cc(C2(C)CCCC)SCCS2)c1                 | 179044-94-1 | 0.32 | 0.52  | 2003:473442  |
| CCCCCCC(=O)c1cc2c([C@@H]3[C@H](CC=C(C)C3)C(C)(C)O2)c(O)c1                   | 179044-95-2 | 21.7 | 83.7  | 1998:170464  |
| OC[C@@H]1C[C@H]2[C@H](CC1)C(Oc1c2c(O)cc(C#CCCCC)c1)(C)C                     | 180989-25-7 | 5.8  | 61.6  | 1996:513738  |
| OC[C@@H]1C[C@H]2[C@H](CC1)C(Oc1c2c(O)cc(/C=C\CCCC)c1)(C)C                   | 180989-26-8 | 0.8  | 9.5   | 1996:513738  |
| OC[C@@H]1C[C@H]2[C@H](CC1)C(Oc1c2c(O)cc(C#CCCCC)c1)(C)C                     | 180989-27-9 | 8.7  | 14.3  | 1996:513738  |
| OC[C@@H]1C[C@H]2[C@H](CC1)C(Oc1c2c(O)cc(/C=C\CCCC)c1)(C)C                   | 181139-62-8 | 1.2  | 5.3   | 1996:513738  |
| OCC1=CC[C@H]2[C@H](C1)c1c(OC2(C)C)cc(cc1)C(C)(C)CCCCC                       | 181764-31-8 | 1.2  | 0.032 | 1996:544126  |
| O=C(c1c(C)c(c2ccc(Br)cc2)n(c2ccc(Cl)cc2Cl)n1)NN1CCCC1                       | 183232-63-5 | 16.8 | 1430  | 1999:84973   |
| O=C(c1c(C)c(c2ccc(I)cc2)n(c2ccc(Cl)cc2Cl)n1)NN1CCCC1                        | 183232-66-8 | 7.49 | 2290  | 1999:84973   |
| CCCCC/C=C\C/C=C\C/C=C\C/C=C\C\CCC(C)(C(=O)N[C@@H](CO)C                      | 187224-15-3 | 220  | 10000 | 2001:466973  |
| CCCCC/C=C\C/C=C\C/C=C\C/C=C\C\CCC(C)(C)C(=O)NC[C@H](O)C                     | 187224-16-4 | 1288 | 10000 | 2001:466973  |
| CCCCC/C=C\C/C=C\C/C=C\C/C=C\C\CCC(C)(C)C(=O)NC[C@H](O)C                     | 187224-18-6 | 107  | 421   | 2001:466973  |
| CCCCC/C=C\C/C=C\C/C=C\C/C=C\C\CCC(C)(C)C(=O)N[C@H](C)CO                     | 187224-20-0 | 876  | 10000 | 2001:466973  |
| CC1(Oc2cc(C(C)CCCC#N)(C)C)cc(O)c2[C@H]2CC(=CC[C@H]12)C)C                    | 189148-90-1 | 1.75 | 1.1   | 2001:120397  |
| Cc1ccc(Cn2nc(C(=O)N[C@H]3C(C)(C)[C@@H]4CC[C@@]3(C)C4)cc2c2ccc(Cl)c(C)c2)cc1 | 192703-06-3 | 50.3 | 1.99  | 2001:87292   |
| Oc1c2c3cc(C)ccc3C(C)(C)Oc2cc(C(C)(C)CCCCC)c1                                | 194714-91-5 | 0.95 | 1.1   | 2007:1374805 |
| OCc1cc2c3c(O)cc(C(C)(C)CCCCC)cc3OC(C)(C)c2cc1                               | 194714-92-6 | 1    | 2.24  | 2000:626409  |
| O=c1c2ccc(C)cc2c2c(O)cc(C(C)(C)CCCCC)cc2o1                                  | 194714-93-7 | 39   | 3.1   | 2007:1374805 |
| CCCCC1c2CCCOc2c2[C@@H]3[C@H](CCC(=C)C3)C(C)(C)Oc2c1                         | 195866-29-6 | 884  | 200   | 1997:603435  |
| O=C1CC[C@H]2[C@@H](c3c4c(CCCO4)c(CCCCC)cc3OC2(C)C)C1                        | 195866-31-0 | 90   | 23    | 1997:603435  |
| O[C@H]1CC[C@H]2[C@@H](c3c4c(CCCO4)c(CCCCC)cc3OC2(C)C)C1                     | 195866-35-4 | 26   | 5.8   | 1997:603435  |
| Oc1c2[C@@H]3[C@H](CC=C(C)C3)C(C)(C)Oc2cc(C#CCCCC)c1                         | 205746-46-9 | 0.65 | 3.1   | 2006:128508  |
| O[C@H](CCCCC)c1cc2c([C@@H]3[C@H](CC=C(C)C3)C(C)(C)O2)c(O)c1                 | 205746-47-0 | 86.4 | 65.6  | 1998:170464  |
| Oc1c2[C@@H]3[C@H](CC=C(C)C3)C(C)(C)Oc2cc(C(=C)CCCCC)c1                      | 205746-48-1 | 2.17 | 3.3   | 1998:170464  |

## Supporting Information

|                                                                                   |             |       |       |             |
|-----------------------------------------------------------------------------------|-------------|-------|-------|-------------|
| Oc1cc(C2(CCCCC)SCCS2)cc(O)c1[C@@H]1C=C(C)CC[C@H]1C(=C)C                           | 205746-54-9 | 136   | 50.4  | 1998:170464 |
| O=C(c1c(C)c(c2cccc2)n(c2ccc(Cl)cc2Cl)n1)NN1CCCCC1                                 | 207805-44-5 | 123   | 217   | 1999:84973  |
| O=C(c1c2cccc2n(CCCC)c1)c1cccc2c1cccc2                                             | 208987-48-8 | 8.9   | 38    | 2000:554114 |
| O=C(c1c2cccc2n(CC)c1C)c1cccc2c1cccc2                                              | 209414-03-9 | 1180  | 964   | 2000:554114 |
| O=C(c1c2cccc2n(C)c1)c1cccc2c1cccc2                                                | 209414-04-0 | 10000 | 10000 | 2000:554114 |
| O=C(c1c2cccc2n(CC)c1)c1cccc2c1cccc2                                               | 209414-05-1 | 1340  | 2940  | 2000:554114 |
| O=C(c1cccc2c1cccc2)c1c2cccc2n(CCC)c1                                              | 209414-06-2 | 1050  | 170   | 2000:554114 |
| O=C(c1cccc2c1cccc2)c1c2cccc2n(CCCCC)c1                                            | 209414-07-3 | 9     | 2.94  | 2000:554114 |
| O=C(c1c2cccc2n(CCCCC)c1)c1cccc2c1cccc2                                            | 209414-08-4 | 9.8   | 5.55  | 2000:554114 |
| O=C(c1c2cccc2n(CCCCCC)c1)c1cccc2c1cccc2                                           | 209414-09-5 | 128   | 205   | 2000:554114 |
| O=C(c1ccc(OC)c2c1cccc2)c1c2cccc2n(C)c1                                            | 210179-35-4 | 10000 | 10000 | 2000:554114 |
| O=C(c1c2cccc2n(CC)c1)c1ccc(OC)c2c1cccc2                                           | 210179-37-6 | 817   | 633   | 2000:554114 |
| O=C(c1ccc(OC)c2c1cccc2)c1c2cccc2n(CCC)c1                                          | 210179-40-1 | 63    | 32    | 2000:554114 |
| O=C(c1c2cccc2n(CCCC)c1)c1ccc(OC)c2c1cccc2                                         | 210179-44-5 | 5.6   | 2.21  | 2000:554114 |
| O=C(c1ccc(OC)c2c1cccc2)c1c2cccc2n(CCCCC)c1                                        | 210179-46-7 | 1.2   | 12.4  | 2000:554114 |
| O=C(c1c2cccc2n(CCCCCC)c1)c1ccc(OC)c2c1cccc2                                       | 210179-48-9 | 5.3   | 6.4   | 2000:554114 |
| OCCNC(=O)CCC/C=C\C/C=C\C/C=C\C=C\C[C@@H](CCCC)O                                   | 212144-00-8 | 738   | 1000  | 1998:486973 |
| Oc1c2[C@@H]3[C@H](CC=C(C)C3)C(C)(C)Oc2cc([C@]23C[C@@H]4C[C@H](C2)C[C@@H](C4)C3)c1 | 212835-02-4 | 6.8   | 52    | 2006:128508 |
| OC[C@@H]1C[C@H]2[C@H](CC1)[C@](O)c1c2c(O)cc(C(C)(C)CCCC)c1)(CC)C                  | 213915-67-4 | 40.7  | 9.7   | 1998:546552 |
| OC[C@@H]1C[C@H]2[C@H](CC1)[C@](O)c1c2c(O)cc(C(C)(C)CCCC)c1)(CCCC)C                | 213915-68-5 | 2.2   | 4.3   | 1998:546552 |
| OC[C@@H]1C[C@H]2[C@H](CC1)[C@](O)c1c2c(O)cc(C(C)(C)CCCC)c1)(CC)C                  | 213915-69-6 | 11.1  | 21.5  | 1998:546552 |
| OC[C@@H]1C[C@H]2[C@H](CC1)[C@@](O)c1c2c(O)cc(C(C)(C)CCCC)c1)(C)CCC                | 213915-70-9 | 14.4  | 38.9  | 1998:546552 |
| CCCC/C=C\C/C=C\C/C=C\C/C=C\C\CCCNCCO                                              | 215818-33-0 | 1300  | 4200  | 1998:635184 |
| C[C@@H](NCCCC/C=C\C/C=C\C/C=C\C/C=C\C\CCCC)CO                                     | 215818-34-1 | 980   | 2100  | 1998:635184 |
| CC(=O)NCCCC/C=C\C/C=C\C/C=C\C/C=C\C\CCCC                                          | 215818-35-2 | 560   | 9600  | 1998:635184 |
| O=C(CCCN1CCOCC1)Oc1cc(C(C)(CCCC#N)C)cc2c1[C@@H]1[C@@H](C(C)(O)2)CC=C(C1)C         | 216988-51-1 | 4.36  | 11.2  | 2000:309882 |
| N1(CCC2=C/C(=C\c3cccc4c3cccc4)/c3c2cccc3)CCOCC1                                   | 220080-15-9 | 2.72  | 2.72  | 1998:762250 |
| Oc1c2[C@@H]3[C@H](CC=C(C)C3)C(C)(C)Oc2cc(CC#CCCN=[N+]=[N-])c1                     | 220543-77-1 | 5.24  | 7.4   | 1999:709954 |

## Supporting Information

|                                                                                                 |             |      |       |              |
|-------------------------------------------------------------------------------------------------|-------------|------|-------|--------------|
| <chem>CCCC/C=C\C/C=C\C/C=C\C/C=C\C\CCCC(=O)NCCCI</chem>                                         | 220556-69-4 | 5.29 | 195   | 1998:786633  |
| <chem>O=C(c1c(C)c(c2ccc([N+](=O)[OH-])cc2)n(c2ccc(Cl)cc2Cl)n1)NN1CCCCC1</chem>                  | 221385-25-7 | 57.5 | 252   | 1999:84973   |
| <chem>O=C(c1c(C)c(c2cccc2[N+](=O)[OH-])n(c2ccc(Cl)cc2Cl)n1)NN1CCCCC1</chem>                     | 221385-26-8 | 255  | 691   | 1999:84973   |
| <chem>O=C(c1c(C)c(c2ccc(N)cc2)n(c2ccc(Cl)cc2Cl)n1)NN1CCCCC1</chem>                              | 221385-28-0 | 81.5 | 958   | 1999:84973   |
| <chem>O=C(c1c(C)c(c2cccc2N)n(c2ccc(Cl)cc2Cl)n1)NN1CCCCC1</chem>                                 | 221385-29-1 | 346  | 931   | 1999:84973   |
| <chem>O=C(c1c(C)c(c2cccc2I)n(c2ccc(Cl)cc2Cl)n1)NN1CCCCC1</chem>                                 | 221385-30-4 | 53.8 | 577   | 1999:84973   |
| <chem>O=C(c1c(C)c(CC)n(c2ccc(Cl)cc2Cl)n1)NN1CCCCC1</chem>                                       | 221385-33-7 | 183  | 744   | 1999:84973   |
| <chem>O=C(c1c(C)c(c2ccc(Cl)cc2)n(c2ccc(Cl)cc2)n1)NN1CCCCC1</chem>                               | 221385-35-9 | 60.4 | 836   | 1999:84973   |
| <chem>O=C(c1c(C)c(c2ccc(Br)cc2)n(c2ccc(Cl)cc2Cl)n1)NN1CCCCC1</chem>                             | 221385-37-1 | 17.1 | 1310  | 1999:84973   |
| <chem>O=C(c1c(C)c(c2ccc(Br)cc2)n(c2ccc(Cl)cc2Cl)n1)NN1CCCCC1</chem>                             | 221385-38-2 | 7.85 | 215   | 1999:84973   |
| <chem>O=C(c1c(C)c(c2ccc(Br)cc2)n(c2ccc(Cl)cc2Cl)n1)NN1CCOCC1</chem>                             | 221385-39-3 | 53.9 | 2450  | 1999:84973   |
| <chem>O=C(N1CCCCC1)c1c(C)c(c2ccc(Br)cc2)n(c2ccc(Cl)cc2Cl)n1</chem>                              | 221385-40-6 | 125  | 4580  | 1999:84973   |
| <chem>CN1CCN(C(=O)c2c(C)c(c3ccc(Br)cc3)n(c3ccc(Cl)cc3Cl)n2)CC1</chem>                           | 221385-41-7 | 326  | 2340  | 1999:84973   |
| <chem>O=C(c1c(C)c(c2ccc(Br)cc2)n(c2ccc(Cl)cc2Cl)n1)NC1CCCCC1</chem>                             | 221385-42-8 | 11.7 | 1010  | 1999:84973   |
| <chem>O=C(c1c(C)c(c2ccc(Br)cc2)n(c2ccc(Cl)cc2Cl)n1)N(C1CCCCC1)C</chem>                          | 221385-43-9 | 76.7 | 1260  | 1999:84973   |
| <chem>O=C(c1c(C)c(c2ccc(Br)cc2)n(c2ccc(Cl)cc2Cl)n1)NCCO</chem>                                  | 221385-44-0 | 1120 | 19000 | 1999:84973   |
| <chem>O=C(c1c(C)c(c2ccc(Br)cc2)n(c2ccc(Cl)cc2Cl)n1)Nc1cccc1</chem>                              | 221385-45-1 | 31.1 | 6750  | 1999:84973   |
| <chem>OCC(OCCCC/C=C\C/C=C\C/C=C\C/C=C\C\CCCC)CO</chem>                                          | 222723-55-9 | 21.2 | 3000  | 2001:266178  |
| <chem>CC1(Oc2cc(C(CCCCC(=O)N(C)C)(C)C)cc(O)c2[C@H]2CC(=CC[C@H]12)C)C</chem>                     | 228997-38-4 | 2.47 | 1.98  | 2001:120397  |
| <chem>CCCC/C=C\C/C=C\C/C=C\C/C=C\C\CCCC(=O)NC1CC1</chem>                                        | 229021-64-1 | 2.2  | 700   | 1999:335427  |
| <chem>Oc1c2[C@@H]3[C@H](CC=C(C)C3)C(C)(C)Oc2cc(CC#CCCCC)c1</chem>                               | 229030-02-8 | 4.26 | 9.33  | 1999:709954  |
| <chem>CCCC/C=C\C/C=C\C/C=C\C/C=C\C\CCCC(=O)Nc1ccc(OC)cc1</chem>                                 | 231632-72-7 | 500  | 4000  | 2005:1241404 |
| <chem>Oc1c2[C@@H]3[C@H](CC=C(C)C3)C(C)(C)Oc2cc(C[C@]23C[C@@H]4C[C@H](C2)C[C@@H](C4)C3)c1</chem> | 249888-97-9 | 29.3 | 26.9  | 2005:529462  |
| <chem>CCCCC#CCc1cc2c([C@@H]3[C@H](CC=C(C)C3)C(C)(C)O2)cc1</chem>                                | 252350-31-5 | 2.34 | 9.77  | 1999:709954  |
| <chem>O[C@@H]1C[C@H]2[C@H](CC1)C(Oc1c2ccc(C(C)C)CCCC)c1(C)C</chem>                              | 259869-52-8 | 7.9  | 5.2   | 2006:156948  |
| <chem>O[C@@H]1C[C@H]2[C@H](CC1)C(Oc1c2ccc(C(C)C)CCCC)c1(C)C</chem>                              | 259869-53-9 | 28   | 23    | 2006:156948  |
| <chem>CC1=CC[C@H]2[C@H](C1)c1c(OC2(C)C)cc(cc1)C(C)(C)CC</chem>                                  | 259869-54-0 | 2290 | 14    | 2006:156948  |
| <chem>CC1=CC[C@H]2[C@H](C1)c1c(OC2(C)C)cc(cc1)C(C)(C)CCC</chem>                                 | 259869-55-1 | 677  | 3.4   | 2006:156948  |

## Supporting Information

|                                                                   |             |       |      |             |
|-------------------------------------------------------------------|-------------|-------|------|-------------|
| <chem>O=C(c1cc2c([nH]c1=O)c(OCCCC)c(OC)cc2)NCc1ccc2OCoc2c1</chem> | 282089-49-0 | 2370  | 35.9 | 2001:87292  |
| <chem>Cc1c(CC(=O)N2CCOCC2)c2cc(OC)ccc2n1C(=O)c1ccc(Cl)cc1</chem>  | 2854-32-2   | 2000  | 435  | 1999:714292 |
| <chem>O=C(c1cc2c3c(OC)cc(C(C)(C)CCCCC)cc3OC(C)(C)c2cc1)OC</chem>  | 305833-26-5 | 10000 | 529  | 2000:626409 |
| <chem>Cc1cc2c3ccc(C(C)(C)CCCCC)cc3OC(C)(C)c2cc1</chem>            | 305833-29-8 | 434   | 167  | 2000:626409 |
| <chem>O=C(c1cc2c3ccc(C(C)(C)CCCCC)cc3OC(C)(C)c2cc1)OC</chem>      | 305833-31-2 | 558   | 276  | 2000:626409 |
| <chem>OCc1cc2c3ccc(C(C)(C)CCCCC)cc3OC(C)(C)c2cc1</chem>           | 305833-32-3 | 2     | 1    | 2000:626409 |
| <chem>Oc1cc(C(C)(C)CCCCC)ccc1c1cc(C)ccc1C(C)C</chem>              | 305833-34-5 | 33    | 3    | 2002:336112 |
| <chem>Cc1cc2c3c(OC)cc(C(C)(C)CCCCC)cc3OC(C)(C)c2cc1</chem>        | 305833-35-6 | 681   | 286  | 2000:626409 |
| <chem>O=C(c1cc2c3c(O)cc(C(C)(C)CCCCC)cc3OC(C)(C)c2cc1)OC</chem>   | 305833-36-7 | 14    | 3.8  | 2000:626409 |
| <chem>O=C(c1cc2c3ccc(C(C)(C)CCC)cc3OC(C)(C)c2cc1)OC</chem>        | 305833-37-8 | 10000 | 611  | 2000:626409 |
| <chem>OCc1cc2c3ccc(C(C)(C)CCC)cc3OC(C)(C)c2cc1</chem>             | 305833-38-9 | 204   | 67   | 2000:626409 |
| <chem>Oc1c2c3cc(C)ccc3C(C)(C)Oc2cc(C(C)(C)CCC)c1</chem>           | 305833-45-8 | 42    | 6    | 2000:626409 |
| <chem>Oc1cc(C(C)(C)CCC)ccc1c1cc(C)ccc1C(C)C</chem>                | 305833-50-5 | 876   | 113  | 2002:336112 |
| <chem>O=C(c1c(C#N)c(c2ccc(OC)cc2)n(c2ccccc2Cl)n1)Nc1ccccc1</chem> | 312494-20-5 | 57    | 114  | 2000:677056 |
| <chem>O=C(c1cccc2c1cc(cc2)C)c1c2cccc2n(CCC)c1C</chem>             | 316189-64-7 | 343   | 16.3 | 2000:554114 |
| <chem>O=C(c1c2cccc2n(CCCC)c1C)c1cccc2c1cc(cc2)C</chem>            | 316189-65-8 | 58.7  | 3.47 | 2000:554114 |
| <chem>O=C(c1cccc2c1cc(cc2)C)c1c2cccc2n(CCCC)c1C</chem>            | 316189-66-9 | 10.7  | 0.49 | 2000:554114 |
| <chem>O=C(c1c2cccc2n(CCCCC)c1C)c1cccc2c1cc(cc2)C</chem>           | 316189-67-0 | 55.1  | 32.3 | 2000:554114 |
| <chem>O=C(c1c2cc(C)ccc2ccc1)c1cn(CCCCCC)c2cccc12</chem>           | 316189-68-1 | 342   | 526  | 2000:554114 |
| <chem>O=C(c1c2cccc2n(CCCCCC)c1)c1cccc2c1cc(cc2)C</chem>           | 316189-69-2 | 106   | 102  | 2000:554114 |
| <chem>O=C(c1c(C)n(CCC)c2cccc12)c1c2cccc2c(OC)cc1</chem>           | 316189-70-5 | 476   | 97.3 | 2000:554114 |
| <chem>O=C(c1c2cccc2c(OC)cc1)c1c(CCCC)n(CCC)c2cccc12</chem>        | 316189-71-6 | 40.7  | 59.1 | 2000:554114 |
| <chem>O=C(c1c2cccc2c(OC)cc1)c1c(C)n(CCCC)c2cccc12</chem>          | 316189-72-7 | 33.7  | 13.3 | 2000:554114 |
| <chem>O=C(c1c2cccc2c(OC)cc1)c1c(CCCC)n(CCCC)c2cccc12</chem>       | 316189-73-8 | 140   | 312  | 2000:554114 |
| <chem>O=C(c1c(C)n(CCCCC)c2cccc12)c1c2cccc2c(OC)cc1</chem>         | 316189-74-9 | 4.5   | 1.88 | 2000:554114 |
| <chem>O=C(c1c2cccc2c(OC)cc1)c1c(CCCC)n(CCCC)c2cccc12</chem>       | 316189-75-0 | 455   | 121  | 2000:554114 |
| <chem>O=C(c1c2cccc2c(OC)cc1)c1c(C)n(CCCCC)c2cccc12</chem>         | 316189-76-1 | 35.3  | 17.8 | 2000:554114 |
| <chem>O=C(c1c2cccc2c(OC)cc1)c1c(C)n(CCCCCC)c2cccc12</chem>        | 316189-77-2 | 381   | 155  | 2000:554114 |



## Supporting Information

|                                                                                          |             |       |       |              |
|------------------------------------------------------------------------------------------|-------------|-------|-------|--------------|
| <chem>CCCC/C=C\C/C=C\C/CC/C=C\CCCC(=O)NCCc1ccc(O)c(O)c1</chem>                           | 320782-29-4 | 1000  | 11300 | 2000:819929  |
| <chem>CCCCCCC(C)(C)/C=C\C/C=C\C/C=C\C/C=C\C/CCCC(=O)NCCc1ccc(O)c(OC)c1</chem>            | 322399-51-9 | 261.8 | 10000 | 2001:122170  |
| <chem>O=C(NCCc1ccc(O)c(OC)c1)CCC/C=C\C/C=C\C/C=C\C/C=C\C/C=C\C/C=C\C(C)(C)CCCCO</chem>   | 322399-54-2 | 789.7 | 10000 | 2001:122170  |
| <chem>O=C(NCCc1ccc(O)c(OC)c1)CCC/C=C\C/C=C\C/C=C\C/C=C\C/C=C\C(C)(C)CCCCBr</chem>        | 322399-59-7 | 32.6  | 10000 | 2001:122170  |
| <chem>O=C(NCCc1ccc(O)c(OC)c1)CCC/C=C\C/C=C\C/C=C\C/C=C\C/C=C\C(C)(C)CCCC#N</chem>        | 322399-60-0 | 67    | 5000  | 2001:122170  |
| <chem>O=C(N1/C(=N/c2ccccc2C(C)C)/SCC(C1)(C)C)OCC</chem>                                  | 330479-67-9 | 5000  | 428   | 2007:684708  |
| <chem>O=c1c2ccc(O)cc2c2c(O)cc(C(C)C)CCCCC)cc2o1</chem>                                   | 335371-37-4 | 400   | 0.82  | 2007:1374805 |
| <chem>Oc1c2c3cc(OC)ccc3c(C)(C)Oc2cc(C(C)C)CCCCC)c1</chem>                                | 335371-40-9 | 5.4   | 5.9   | 2007:1374805 |
| <chem>N#Cc1ccc(OCCCCC(c2cc3c([C@@H]4[C@H](CC=C(C)C4)C(C)(C)O3)c(O)c2)(C)C)cc1</chem>     | 336104-65-5 | 1.5   | 1.14  | 2001:120397  |
| <chem>CC1(Oc2cc(CCCCC(=O)Nc3ccc(S(=O)(=O)N)cc3)(C)C)cc(O)c2[C@H]2CC(=CC[C@H]12)C</chem>  | 336104-66-6 | 41.5  | 10.3  | 2001:120397  |
| <chem>CC1(Oc2cc(CCCCC(=O)NN3CCCC3)(C)C)cc(O)c2[C@H]2CC(=CC[C@H]12)C</chem>               | 336104-67-7 | 4.51  | 3.23  | 2001:120397  |
| <chem>CC1(Oc2cc(CCCCC(=O)Nc3cc(Cl)cc(Cl)cc3)(C)C)cc(O)c2[C@H]2CC(=CC[C@H]12)C</chem>     | 336104-68-8 | 41.2  | 37.2  | 2001:120397  |
| <chem>CC1(Oc2cc(CCCCC(=O)N(C)C)(C)C)cc(O)c2[C@H]2CC(=CC[C@H]12)C</chem>                  | 336104-69-9 | 23.9  | 2.47  | 2001:120397  |
| <chem>CC1(Oc2cc(CCCCC[C@H](c3ccccc3)C#N)(C)C)cc(O)c2[C@H]2CC(=CC[C@H]12)C</chem>         | 336104-70-2 | 18.4  | 5.75  | 2001:120397  |
| <chem>CC1(Oc2cc(CCCCC(=O)NCC3ccc(S(=O)(=O)N)cc3)(C)C)cc(O)c2[C@H]2CC(=CC[C@H]12)C</chem> | 336104-71-3 | 180   | 2.27  | 2001:120397  |
| <chem>CC1(Oc2cc(CCCCC(=O)O)(C)C)cc(O)c2[C@H]2CC(=CC[C@H]12)C</chem>                      | 336104-73-5 | 222   | 4     | 2001:120397  |
| <chem>CC1(Oc2cc(CCCCC#N)(C)C)cc(O)c2[C@H]2CC(=CC[C@H]12)C</chem>                         | 336104-74-6 | 0.19  | 2.94  | 2001:120397  |
| <chem>CC1(Oc2cc(CCCCC(=O)Nc3ccc(Cl)cc3)(C)C)cc(O)c2[C@H]2CC(=CC[C@H]12)C</chem>          | 336104-76-8 | 395   | 11.3  | 2001:120397  |
| <chem>CC1(Oc2cc(CCCCC[C@H](C#N)O)(C)C)cc(O)c2[C@H]2CC(=CC[C@H]12)C</chem>                | 336104-77-9 | 21.3  | 3.22  | 2001:120397  |
| <chem>O=C(c1c(C)c(c2ccc(Cl)cc2)n(c2ccc(Cl)cc2Cl)n1)NCCCC</chem>                          | 336615-64-6 | 11.4  | 1110  | 2002:372410  |
| <chem>O=C(c1c(C)c(c2ccc(Cl)cc2)n(c2ccc(Cl)cc2Cl)n1)NCCC</chem>                           | 336615-69-1 | 29.9  | 2960  | 2002:372410  |
| <chem>O=C(N[C@H](C)CO)CCC/C=C\C/C=C\C/C=C\C/C=C\C/C=C\C(C)(C)CCCCO</chem>                | 342882-76-2 | 115.2 | 800.1 | 2001:122170  |
| <chem>O=C(N[C@H](C)CO)CCC/C=C\C/C=C\C/C=C\C/C=C\C(C)(C)CCCC#N</chem>                     | 342882-77-3 | 3.4   | 3870  | 2001:122170  |
| <chem>O=C(N[C@H](C)CO)CCC/C=C\C/C=C\C/C=C\C/C=C\C(C)(C)CCCCBr</chem>                     | 342882-78-4 | 2.2   | 10000 | 2001:122170  |
| <chem>O=C(OC)[C@H](Cc1ccccc1)NC(=O)c1c2cccc(OC)c2n(CCN2CCOCC2)c1C</chem>                 | 354569-07-6 | 4000  | 8     | 2002:585100  |
| <chem>O=c1n(Cc2ccccc2OC)ccc2c1c1cccc(OC)c1n2CCN1CCOCC1</chem>                            | 354570-13-1 | 3700  | 67    | 2003:320274  |
| <chem>O=c1n([C@@H]2[C@@]3[C@H](CC3)C2(C)C)ccc2c1c1cccc(OC)c1n2CCN1CCOCC1</chem>          | 354570-35-7 | 16    | 1     | 2003:320274  |
| <chem>N=C(N1N=C(c2ccc(Cl)cc2)[C@@H](c2ccccc2)C1)NS(=O)(=O)c1ccc(F)cc1</chem>             | 362519-28-6 | 52.6  | 1000  | 2003:1011327 |

# Supporting Information

|                                                                            |             |      |       |              |
|----------------------------------------------------------------------------|-------------|------|-------|--------------|
| N=C(N1N=C(c2ccc(Cl)cc2)[C@@H](c2ccccc2)C1)NS(=O)(=O)c1c(C)cc(C)cc1C        | 362519-37-7 | 24.2 | 1000  | 2003:1011327 |
| CN(C)/C(=N\S(=O)(=O)c1ccc(Cl)cc1)/N1N=C(c2ccc(Cl)cc2)[C@@H](c2ccccc2)C1    | 362519-41-3 | 280  | 1000  | 2003:1011327 |
| C/N=C(N1N=C(c2ccc(Cl)cc2)[C@@H](c2ccccc2)C1)\NS(=O)(=O)c1ccc(Cl)cc1        | 362519-49-1 | 25.2 | 1000  | 2003:1011327 |
| N=C(N1N=C(c2ccc(Cl)cc2)[C@@H](c2ccccc2)C1)NS(=O)(=O)c1ccc(Cl)cc1           | 362519-50-4 | 16.1 | 1000  | 2003:1011327 |
| C/N=C(N1N=C(c2ccc(Cl)cc2)[C@@H](c2ccccc2)C1)\NS(=O)(=O)c1cccc(Cl)c1        | 362519-52-6 | 13.9 | 1000  | 2003:1011327 |
| O=S(=O)(N/C(=N\C)/N1N=C(c2ccc(Cl)cc2)[C@@H](c2ccccc2)C1)c1ccc(C(F)(F)F)cc1 | 362519-66-2 | 221  | 1000  | 2003:1011327 |
| CCCCC/C=C\C/C=C\C/C=C\C/C=C\C\CC[C@H](C)C(=O)NCCO                          | 372504-52-4 | 54.1 | 4905  | 2001:466973  |
| CCCCC/C=C\C/C=C\C/C=C\C/C=C\C\CC[C@H](C)C(=O)NCCO                          | 372504-55-7 | 35.3 | 4259  | 2001:466973  |
| CCCCC/C=C\C/C=C\C/C=C\C/C=C\C\CC[C@H](C)C(=O)N[C@H](C)CO                   | 372504-60-4 | 7.42 | 1952  | 2001:466973  |
| CCCCC/C=C\C/C=C\C/C=C\C/C=C\C\CC[C@H](C)C(=O)N[C@H](C)CO                   | 372504-63-7 | 185  | 4876  | 2001:466973  |
| CCCCC/C=C\C/C=C\C/C=C\C/C=C\C\CC[C@H](C)C(=O)N[C@H](C)CO                   | 372504-66-0 | 389  | 2876  | 2001:466973  |
| CCCCC/C=C\C/C=C\C/C=C\C/C=C\C\CC[C@H](C)C(=O)N[C@H](C)CO                   | 372504-69-3 | 233  | 4695  | 2001:466973  |
| CCCCC/C=C\C/C=C\C/C=C\C/C=C\C\CCCC(=O)NCc1cccn1C                           | 390824-18-7 | 124  | 70    | 2001:836853  |
| CCCCC/C=C\C/C=C\C/C=C\C/C=C\C\CCCC(=O)NCc1ccoc1                            | 390824-20-1 | 1000 | 67    | 2001:836853  |
| CC1=CC[C@H]2[C@H](C1)c1c(OC2(C)C)cc(cc1F)CCCCC                             | 431041-31-5 | 1557 | 1508  | 2007:228762  |
| O=C(c1c(C)c(c2ccc(Cl)cc2)n(c2ccc(Cl)cc2Cl)n1)NCC                           | 443141-78-4 | 46.3 | 3110  | 2002:372410  |
| O=C(c1c(C)c(c2ccc(Cl)cc2)n(c2ccc(Cl)cc2Cl)n1)NC(C)C                        | 443141-79-5 | 29.4 | 1740  | 2002:372410  |
| O=C(c1c(C)c(c2ccc(Cl)cc2)n(c2ccc(Cl)cc2Cl)n1)NCCCC                         | 443141-80-8 | 13.4 | 1600  | 2002:372410  |
| O=C(c1c(C)c(c2ccc(Cl)cc2)n(c2ccc(Cl)cc2Cl)n1)NCC(C)C                       | 443141-81-9 | 11.5 | 704   | 2002:372410  |
| O=C(c1c(C)c(c2ccc(Cl)cc2)n(c2ccc(Cl)cc2Cl)n1)NCCCCC                        | 443141-82-0 | 18.1 | 6870  | 2002:372410  |
| O=C(c1c(C)c(c2ccc(Cl)cc2)n(c2ccc(Cl)cc2Cl)n1)NN1CCOCC1                     | 443141-83-1 | 22.9 | 2400  | 2002:372410  |
| O=C(c1c(C)c(c2ccc(Cl)cc2)n(c2ccc(Cl)cc2Cl)n1)NO                            | 443141-84-2 | 1690 | 7820  | 2002:372410  |
| O=C(c1c(C)c(c2ccc(Cl)cc2)n(c2ccc(Cl)cc2Cl)n1)NCCO                          | 443141-85-3 | 385  | 4270  | 2002:372410  |
| O=C(c1c(C)c(c2ccc(Cl)cc2)n(c2ccc(Cl)cc2Cl)n1)NCCCO                         | 443141-86-4 | 160  | 1250  | 2002:372410  |
| O=C(c1c(C)c(c2ccc(Cl)cc2)n(c2ccc(Cl)cc2Cl)n1)NCCCCO                        | 443141-87-5 | 154  | 5720  | 2002:372410  |
| O=C(c1c(C)c(c2ccc(Cl)cc2)n(c2ccc(Cl)cc2Cl)n1)N[C@H](C)CO                   | 443141-88-6 | 117  | 5900  | 2002:372410  |
| O=C(c1c(C)c(c2ccc(Cl)cc2)n(c2ccc(Cl)cc2Cl)n1)N[C@H](C)CO                   | 443141-89-7 | 117  | 1770  | 2002:372410  |
| O=C(c1c(C)c(c2ccc(Cl)cc2)n(c2ccc(Cl)cc2Cl)n1)NN                            | 443141-90-0 | 374  | 12100 | 2002:372410  |

## Supporting Information

|                                                                                        |             |       |      |              |
|----------------------------------------------------------------------------------------|-------------|-------|------|--------------|
| <chem>O=C(c1c(C)c(c2ccc(Cl)cc2)n(c2ccc(Cl)cc2Cl)n1)NNC</chem>                          | 443141-91-1 | 555   | 6660 | 2002:372410  |
| <chem>O=C(c1c(C)c(c2ccc(Cl)cc2)n(c2ccc(Cl)cc2Cl)n1)NNCC</chem>                         | 443141-92-2 | 143   | 6061 | 2002:372410  |
| <chem>O=C(c1c(C)c(c2ccc(Cl)cc2)n(c2ccc(Cl)cc2Cl)n1)NNCCC</chem>                        | 443141-93-3 | 74.8  | 2620 | 2002:372410  |
| <chem>O=C(c1c(C)c(c2ccc(Cl)cc2)n(c2ccc(Cl)cc2Cl)n1)NNCCCC</chem>                       | 443141-94-4 | 50.9  | 2850 | 2002:372410  |
| <chem>O=C(c1c(C)c(c2ccc(Cl)cc2)n(c2ccc(Cl)cc2Cl)n1)NNCC(C)C</chem>                     | 443141-95-5 | 41.8  | 2190 | 2002:372410  |
| <chem>O=C(c1cccc1)c1c2cccc2n(C[C@H]2N(C)CCCC2)c1</chem>                                | 444912-55-4 | 1.8   | 2.2  | 2005:980153  |
| <chem>O=C(c1cccc1)c1c2cccc2n(C[C@H]2N(C)CCCC2)c1</chem>                                | 444912-57-6 | 560   | 580  | 2005:980153  |
| <chem>O=C(c1cccc1)c1c2cccc2n(C[C@H]2N(C)CCCC2)c1</chem>                                | 444912-75-8 | 2.8   | 2.9  | 2005:980153  |
| <chem>C/N=C(/N1N=C(c2ccc(Cl)cc2)[C@@H](c2cccc2)C1)\NS(=O)(=O)c1ccc(Cl)cc1</chem>       | 464213-10-3 | 7.8   | 7943 | 2003:1011327 |
| <chem>O=S(=O)(N/C(=N\C)/N1N=C(c2ccc(Cl)cc2)[C@@H](c2cccc2)C1)c1ccc(C(F)(F)F)cc1</chem> | 464213-13-6 | 35.9  | 3515 | 2003:1011327 |
| <chem>OCc1ccc(C(C)C)c(c2ccc(C(C)(C)CCCCC)cc2O)c1</chem>                                | 468083-72-9 | 5     | 3    | 2002:336112  |
| <chem>Oc1cc(C(C)(C)CCCCC)cc(O)c1C1CCCC1</chem>                                         | 468083-73-0 | 95    | 7    | 2002:336112  |
| <chem>Oc1cc(C(C)(C)CCCCC)cc(O)c1C1CCCC1</chem>                                         | 468083-74-1 | 11    | 1.5  | 2002:336112  |
| <chem>Oc1cc(C(C)(C)CCCCC)cc(O)c1C1CCCCC1</chem>                                        | 468083-75-2 | 18    | 2    | 2002:336112  |
| <chem>Oc1cc(C(C)(C)CCCCC)cc(O)c1[C@@H]1[C@@H]2C[C@H]3C[C@@H](C2)C[C@H]1C3</chem>       | 468083-76-3 | 7     | 3    | 2002:336112  |
| <chem>Oc1cc(C(C)(C)CCCCC)cc(O)c1C1CCSCC1</chem>                                        | 468083-77-4 | 153   | 12   | 2002:336112  |
| <chem>Oc1cc(C(C)(C)CCCCC)cc(O)c1[C@@H]1CSCC1</chem>                                    | 468083-78-5 | 138   | 28   | 2002:336112  |
| <chem>Oc1cc(C(C)(C)CCCCC)cc(O)c1C1CCN(C)CC1</chem>                                     | 468083-79-6 | 10000 | 5424 | 2002:336112  |
| <chem>Oc1cc(C(C)(C)CCCCC)cc(O)c1C1=CCCC1</chem>                                        | 468083-80-9 | 97    | 28   | 2002:336112  |
| <chem>Oc1cc(C(C)(C)CCCCC)cc(O)c1[C@H]1[C@H](C)CCCC1</chem>                             | 468083-82-1 | 16    | 1    | 2002:336112  |
| <chem>Oc1cc(C(C)(C)CCCCC)cc(O)c1[C@H]1CC[C@H](C)CC1</chem>                             | 468083-83-2 | 45    | 5    | 2002:336112  |
| <chem>Oc1cc(C(C)(C)CCCCC)cc(O)c1[C@H]1CC[C@H](c2cccc2)CC1</chem>                       | 468083-84-3 | 144   | 9    | 2002:336112  |
| <chem>Oc1cc(C(C)(C)CCCCC)cc(O)c1[C@@H]1C[C@H](C)CCC1</chem>                            | 468083-85-4 | 14    | 0.8  | 2002:336112  |
| <chem>Oc1cc(C(C)(C)CCC)cc(O)c1[C@@H]1C[C@H](C)CCC1</chem>                              | 468083-86-5 | 96    | 13   | 2002:336112  |
| <chem>C[C@@H]1C[C@H](c2c(OC)cc(C(C)(C)CCCCC)cc2OC)CCC1</chem>                          | 468083-89-8 | 10000 | 466  | 2002:336112  |
| <chem>COc1c(C2CCOCC2)c(OC)cc(C(C)(C)CCCCC)c1</chem>                                    | 468083-90-1 | 10000 | 911  | 2002:336112  |
| <chem>OC1(c2c(OC)cc(C(C)(C)CCCCC)cc2OC)CCOCC1</chem>                                   | 468083-92-3 | 10000 | 342  | 2002:336112  |
| <chem>OC1(CCC2(CC1)OCCO2)c1c(OC)cc(C(C)(C)CCCCC)cc1OC</chem>                           | 468083-93-4 | 4581  | 126  | 2002:336112  |

## Supporting Information

|                                                                        |             |         |      |              |
|------------------------------------------------------------------------|-------------|---------|------|--------------|
| O[C@H]1C[C@H]2O[C@@]2(c2c(OC)cc(C(C)(C)CCCCC)cc2OC)CC1                 | 468083-94-5 | 3758    | 1065 | 2002:336112  |
| O=C1CC=C(c2c(OC)cc(C(C)(C)CCCCC)cc2OC)CC1                              | 468083-95-6 | 8442    | 1773 | 2002:336112  |
| O=C1CCC(O)(c2c(OC)cc(C(C)(C)CCCCC)cc2OC)CC1                            | 468083-96-7 | 4572    | 346  | 2002:336112  |
| O=C1C[C@](O)(c2c(OC)cc(C(C)(C)CCCCC)cc2OC)C[C@H](C)C1                  | 468083-97-8 | 1731    | 125  | 2002:336112  |
| OC1(c2c(OC)cc(C(C)(C)CCCCC)cc2OC)CCCC1                                 | 468083-98-9 | 5820    | 105  | 2002:336112  |
| O[C@]1(c2c(OC)cc(C(C)(C)CCCCC)cc2OC)C[C@@H](O)C[C@@H](C)C1             | 468084-00-6 | 1990    | 101  | 2002:336112  |
| O[C@]1(c2c(OC)cc(C(C)(C)CCCCC)cc2OC)CC[C@H](O)CC1                      | 468084-01-7 | 10000   | 1561 | 2002:336112  |
| O[C@@]1(c2c(OC)cc(C(C)(C)CCCCC)cc2OC)CC(C)(C)CCC1                      | 468084-02-8 | 7515    | 161  | 2002:336112  |
| O[C@]1(c2c(OCC)cc(C(C)(C)CCCCC)cc2OCC)C[C@@H](C)CCC1                   | 468084-04-0 | 8810    | 858  | 2002:336112  |
| OC1(c2c(OC)cc(C(C)(C)CCCCC)cc2OC)CCCCC1                                | 468084-05-1 | 3201    | 64   | 2002:336112  |
| O=C(c1nn(c2ccc(Cl)cc2Cl)c2c1CCCc1cc(Cl)ccc21)NN1CCCCC1                 | 494844-07-4 | 0.00035 | 21   | 2005:1118017 |
| O=C(c1nn(c2ccc(Cl)cc2Cl)c2c1CCCc1cccc21)NN1CCCCC1                      | 494844-08-5 | 168     | 18.1 | 2005:1118017 |
| O=C(c1nn(c2ccc(Cl)cc2Cl)c2c1CCCc1cc(Cl)ccc21)NN1CCCCC1                 | 494844-12-1 | 0.001   | 2    | 2005:1118017 |
| O=C(c1nn(c2ccc(Cl)cc2Cl)c2c1CCCc1ccc(Cl)cc21)NN1CCCCC1                 | 494844-13-2 | 31.2    | 26.8 | 2005:1118017 |
| Oc1ccc(C[C@@H](C(=O)OC)NC(=O)/C=C/c2ccc(OC)c(OCCCC)c2)cc1              | 501926-53-0 | 5700    | 120  | 2002:585100  |
| O=C(c1c2cccc(OC)c2n(CCN2CCOCC2)c1)N[C@@H]1[C@@]2(C[C@@H](CC2)C1(C)C)C  | 501926-82-5 | 245     | 11   | 2003:320274  |
| O=C(c1c2cccc(OC)c2n(CCN2CCOCC2)c1C)N[C@@H]1[C@@]2(C[C@@H](CC2)C1(C)C)C | 501927-29-3 | 8       | 29   | 2003:320274  |
| C/N=C(/N1N=C(c2ccc(Cl)cc2)[C@@H](c2cccc2)C1)\NS(=O)(=O)N(CC)C          | 505030-92-2 | 117     | 1871 | 2005:1024928 |
| C/N=C(/N1N=C(c2ccc(Cl)cc2)[C@@H](c2cccc2)C1)\NS(=O)(=O)N(CC)CC         | 505031-03-8 | 30      | 3270 | 2005:1024928 |
| O=S(=O)/N=C(/N1N=C(c2ccc(Cl)cc2)[C@@H](c2cccc2)C1)\NC)N1CCCCC1         | 505031-04-9 | 231     | 1601 | 2005:1024928 |
| O=S(=O)/N=C(/N1N=C(c2ccc(Cl)cc2)[C@@H](c2cccc2)C1)\NC)N1CCCCC1         | 505031-07-2 | 152     | 1321 | 2005:1024928 |
| O=S(=O)/N=C(/N1N=C(c2ccc(Cl)cc2)[C@@H](c2cccc2)C1)\NC)N(C)C(C)C        | 505031-09-4 | 32      | 1126 | 2005:1024928 |
| C/N=C(/N1N=C(c2ccc(Cl)cc2)[C@@H](c2cccc2)C1)\NS(=O)(=O)N1CCCCCCC1      | 505031-10-7 | 125     | 2584 | 2005:1024928 |
| CN/C(=N\S(=O)(=O)N(C)C)/N1N=C(c2ccc(Cl)cc2)[C@@H](c2cccc2)C1           | 505031-11-8 | 223     | 3835 | 2005:1024928 |
| CCN/C(=N\S(=O)(=O)N(CC)C)/N1N=C(c2ccc(Cl)cc2)[C@@H](c2cccc2)C1         | 505031-40-3 | 209     | 2864 | 2005:1024928 |
| CC(/N=C(/N1N=C(c2ccc(Cl)cc2)[C@@H](c2cccc2)C1)\NS(=O)(=O)N(CC)CC)C     | 505031-43-6 | 60      | 2755 | 2005:1024928 |
| C/N=C(/N1N=C(c2ccc(Cl)cc2)[C@@H](c2cccnc2)C1)\NS(=O)(=O)N(CC)CC        | 505031-49-2 | 141     | 9077 | 2005:1024928 |
| O=S(=O)/N=C(/N1N=C(c2ccc(Cl)cc2)[C@@H](c2cccc2)C1)\NC)N1CCCCC1         | 505031-78-7 | 58      | 3495 | 2005:1024928 |

## Supporting Information

|                                                                                       |             |      |       |              |
|---------------------------------------------------------------------------------------|-------------|------|-------|--------------|
| <chem>O=C(c1c(C)n(c2ccc(Cl)cc2Cl)c(c2ccc(Cl)cc2)n1)NN1CCCCC1</chem>                   | 505073-38-1 | 403  | 208   | 2004:790826  |
| <chem>O=C(c1c(C)n(c2ccc(Cl)cc2)c(c2ccc(Cl)cc2Cl)n1)NOC(C)(C)C</chem>                  | 505073-41-6 | 333  | 242   | 2004:790826  |
| <chem>O=C(c1c(CC)n(c2ccc(Cl)cc2)c(c2ccc(Cl)cc2Cl)n1)NN1CCCCC1</chem>                  | 505073-43-8 | 30   | 608   | 2004:790826  |
| <chem>O=C(c1c(C)n(c2ccc(Br)cc2)c(c2ccc(Cl)cc2Cl)n1)NN1CCCCC1</chem>                   | 505073-44-9 | 60   | 489   | 2004:790826  |
| <chem>O=C(c1c(C)n(c2ccc(C(F)(F)F)cc2)c(c2ccc(Cl)cc2Cl)n1)NN1CCCCC1</chem>             | 505073-81-4 | 29   | 634   | 2004:790826  |
| <chem>O=C(c1c(C)n(c2ccc(F)cc2)c(c2ccc(Cl)cc2Cl)n1)NN1CCCCC1</chem>                    | 505074-09-9 | 52   | 765   | 2004:790826  |
| <chem>O=C(c1c(C)n(c2ccc(OC)cc2)c(c2ccc(Cl)cc2Cl)n1)NN1CCCCC1</chem>                   | 505074-10-2 | 106  | 326   | 2004:790826  |
| <chem>O=C(c1c(C)n(c2ccc(Cl)cc2)c(c2ccc(Cl)cc2Cl)n1)NN1C[C@H]2[C@H](CCC2)C1</chem>     | 505074-28-2 | 40   | 1412  | 2004:790826  |
| <chem>O=C(c1c(C)n(c2ccc(Cl)cc2)c(c2ccc(Cl)cc2Cl)n1)N[C@H]1CC[C@H](O)CC1</chem>        | 505074-33-9 | 399  | 3469  | 2004:790826  |
| <chem>O=C(c1c(C)n(c2ccc(Cl)cc2)c(c2ccc(Cl)cc2Cl)n1)N[C@H]1[C@H]2C[C@@H](CC2)C1</chem> | 505074-35-1 | 19   | 54    | 2004:790826  |
| <chem>O=C(c1c(C)n(c2ccc(Cl)cc2)c(c2ccc(Cl)cc2Cl)n1)NN1CCCCC1</chem>                   | 505074-37-3 | 64   | 505   | 2004:790826  |
| <chem>O=C(c1c(C)n(c2ccc(Cl)cc2)c(c2ccc(Cl)cc2Cl)n1)NN1CCCCC1</chem>                   | 505074-38-4 | 27   | 774   | 2004:790826  |
| <chem>O=C(c1c(C)n(c2ccc(Cl)cc2)c(c2ccc(Cl)cc2Cl)n1)NN1CCOCC1</chem>                   | 505074-39-5 | 197  | 3297  | 2004:790826  |
| <chem>O=C(c1c(C)n(c2ccc(Cl)cc2)c(c2ccc(Cl)cc2Cl)n1)NCc1ccc(C(F)(F)F)cc1</chem>        | 505074-51-1 | 171  | 1984  | 2004:790826  |
| <chem>O=C(c1c(C)n(c2ccc(Cl)cc2)c(c2ccc(Cl)cc2Cl)n1)NC1CCCC1</chem>                    | 505074-52-2 | 33   | 357   | 2004:790826  |
| <chem>O=C(c1c(C)n(c2ccc(Cl)cc2)c(c2ccc(Cl)cc2Cl)n1)NC1CCCCC1</chem>                   | 505074-53-3 | 35   | 349   | 2004:790826  |
| <chem>O=C(c1c(C)n(c2ccc(Cl)cc2)c(c2ccc(Cl)cc2Cl)n1)OC(C)(C)C</chem>                   | 505074-58-8 | 94   | 815   | 2004:790826  |
| <chem>O=C(c1c(C#N)n(c2ccc(Cl)cc2)c(c2ccc(Cl)cc2Cl)n1)NN1CCCCC1</chem>                 | 505074-60-2 | 30   | 1590  | 2004:790826  |
| <chem>Oc1c2c3cc(C)ccc3C(C)(C)Oc2cc(CCCCC)c1</chem>                                    | 521-35-7    | 309  | 95.5  | 2000:338367  |
| <chem>OCC1=CC[C@H]2[C@H](C1)c1c(OC2(C)C)cc(cc1)C(C)(C)CCCCC</chem>                    | 525587-98-8 | 1.2  | 0.032 | 2006:156948  |
| <chem>O=C(c1c2cccc(OC)c2n(CCN2CCOCC2)n1)N[C@H]1[C@@]2(C[C@@H](CC2)C1(C)C)C</chem>     | 545424-33-7 | 24   | 2     | 2003:320274  |
| <chem>O=C(c1c2cccc(OC)c2n(CCN2CCOCC2)n1)N[C@H](c1cccc1)c1ncccc1</chem>                | 545424-35-9 | 162  | 146   | 2003:320274  |
| <chem>O=C(c1ccc(C)c2c1cccc2)c1c2cccc2n(CCCCC)c1C</chem>                               | 548461-82-1 | 5    | 0.73  | 2004:1043347 |
| <chem>O=C(c1c(C)n(c2ccc(Cl)cc2)c(c2ccc(Cl)cc2Cl)n1)NC1CCCCC1</chem>                   | 572889-89-5 | 35   | 160   | 2004:790826  |
| <chem>Oc1c2[C@@H]3[C@H](CC=C(C)C3)C(C)(C)Oc2cc(C2(CCCCC)CCCC2)c1</chem>               | 579444-43-2 | 0.45 | 1.92  | 2003:473442  |
| <chem>Oc1c2[C@@H]3[C@H](CC=C(C)C3)C(C)(C)Oc2cc(C2(CCCCC)SCCS2)c1</chem>               | 579444-44-3 | 1.8  | 3.6   | 2003:473442  |
| <chem>Oc1c2[C@@H]3[C@H](CC=C(C)C3)C(C)(C)Oc2cc(C2(CCCCC)OCCO2)c1</chem>               | 579444-45-4 | 0.52 | 0.22  | 2003:473442  |
| <chem>Oc1c2[C@@H]3[C@H](CC=C(C)C3)C(C)(C)Oc2cc([C@@]2(CCCCC)Sc3cccc3S2)c1</chem>      | 579444-46-5 | 56.9 | 257   | 2003:473442  |

## Supporting Information

|                                                                                            |             |      |       |              |
|--------------------------------------------------------------------------------------------|-------------|------|-------|--------------|
| <chem>Oc1c2[C@@H]3[C@H](CC=C(C)C3)C(C)(C)Oc2cc([C@@]2(CCCCC)S[C@H](C)[C@@H](C)S2)c1</chem> | 581068-72-6 | 32.3 | 19.7  | 2003:473442  |
| <chem>Oc1c2[C@@H]3[C@H](CC=C(C)C3)C(C)(C)Oc2cc(CCCCC)c1</chem>                             | 5957-75-5   | 28.5 | 25    | 2003:462556  |
| <chem>O=C(c1nc(c2ccc(Cl)cc2)c(c2ccc(Cl)cc2Cl)s1)NN1CCCC1</chem>                            | 605670-36-8 | 1000 | 4668  | 2004:790826  |
| <chem>O=C(c1nc(c2ccc(Cl)cc2Cl)c(c2ccc(Cl)cc2)s1)NN1CCCC1</chem>                            | 605670-37-9 | 227  | 5841  | 2004:790826  |
| <chem>Oc1c2[C@@H]3[C@H](CC=C(C)C3)C(C)(C)Oc2cc(C(C)(C)CCCC)c1</chem>                       | 61597-27-1  | 0.83 | 0.49  | 2003:473442  |
| <chem>O=C(c1ccc(C)c2c1ccc2)c1c2ccccc2n(CCCCC)c1</chem>                                     | 619294-47-2 | 0.69 | 1.2   | 2004:1043347 |
| <chem>Oc1cc(C(C)(C)CCCC)cc(O)c1[C@@H]1CC(C)(C)CCC1</chem>                                  | 620964-96-7 | 2    | 0.3   | 2002:336112  |
| <chem>Oc1c2[C@@H]3[C@H](CC=C(C)C3)C(C)(C)Oc2cc(C2(C3CCCC3)SCCS2)c1</chem>                  | 623560-04-3 | 9.49 | 2.74  | 2003:462556  |
| <chem>Oc1c2[C@@H]3[C@H](CC=C(C)C3)C(C)(C)Oc2cc(C2(C3CCCC3)SCCS2)c1</chem>                  | 623560-05-4 | 1.86 | 1.05  | 2003:462556  |
| <chem>Oc1c2[C@@H]3[C@H](CC=C(C)C3)C(C)(C)Oc2cc(C2(C3CCCCC3)SCCS2)c1</chem>                 | 623560-08-7 | 1.76 | 6.62  | 2003:462556  |
| <chem>Oc1c2[C@@H]3[C@H](CC=C(C)C3)C(C)(C)Oc2cc(C(C)(C2CCCC2)C)c1</chem>                    | 623560-10-1 | 0.34 | 0.39  | 2003:462556  |
| <chem>Oc1c2[C@@H]3[C@H](CC=C(C)C3)C(C)(C)Oc2cc(C(C)(C2CCCC2)C)c1</chem>                    | 623560-11-2 | 0.57 | 0.65  | 2003:462556  |
| <chem>Oc1c2[C@@H]3[C@H](CC=C(C)C3)C(C)(C)Oc2cc(C(C)(C2CCCC2)C)c1</chem>                    | 623560-12-3 | 0.94 | 0.22  | 2003:462556  |
| <chem>N=C(N1N=C(c2ccc(Cl)cc2)[C@@H](c2ccccc2)C1)NS(=O)(=O)c1ccc(C)cc1</chem>               | 656827-41-7 | 197  | 1000  | 2003:1011327 |
| <chem>N=C(N1N=C(c2ccc(Cl)cc2)[C@@H](c2ccccc2)C1)NS(=O)(=O)c1ccc(OC)cc1</chem>              | 656827-42-8 | 196  | 1000  | 2003:1011327 |
| <chem>O=S(=O)(/N=C(/N1N=C(c2ccc(Cl)cc2)[C@@H](c2ccccc2)C1)\SC)c1ccc(C(F)(F)F)cc1</chem>    | 656827-49-5 | 16.6 | 1000  | 2003:1011327 |
| <chem>C/N=C(/N1N=C(c2ccc(Cl)cc2)[C@@H](c2ccccc2)C1)\NS(=O)(=O)c1ccccc1Cl</chem>            | 656827-52-0 | 75.4 | 1000  | 2003:1011327 |
| <chem>C/N=C(/N1N=C(c2ccc(Cl)cc2)[C@@H](c2ccccc2)C1)\NS(=O)(=O)c1ccc(F)cc1</chem>           | 656827-72-4 | 338  | 1000  | 2003:1011327 |
| <chem>O=S(=O)(N/C(=N\C)/N1N=C(c2ccc(Cl)cc2)[C@@H](c2ccccc2)C1)c1ccc(C(F)(F)F)cc1</chem>    | 656827-75-7 | 36.5 | 1000  | 2003:1011327 |
| <chem>O=S(=O)(N/C(=N\C)/N1N=C(c2ccc(Cl)cc2)[C@@H](c2ccccc2)C1)c1ccc(C(F)(F)F)cc1</chem>    | 656827-82-6 | 293  | 1000  | 2003:1011327 |
| <chem>CCCCCCC/C=C\CCCCCCCC(=O)N[C@H](c1ccccc1)CO</chem>                                    | 709671-89-6 | 2.7  | 2     | 2004:735312  |
| <chem>CCCCCCC/C=C\CCCCCCCC(=O)N[C@H](CO)Cc1ccccc1</chem>                                   | 709672-12-8 | 0.5  | 2.5   | 2004:735312  |
| <chem>Oc1c2[C@@H]3[C@H](CC=C(C)C3)C(C)(C)Oc2cc(C2SCCS2)c1</chem>                           | 71555-69-6  | 168  | 103   | 2003:473442  |
| <chem>O=c1c2nn(c3ccccc3Cl)c(c3ccc(Cl)cc3)c2ncn1CC(F)F</chem>                               | 784192-17-2 | 0.3  | 10000 | 2005:1341997 |
| <chem>O=c1c2nn(c3ccccc3Cl)c(c3ccc(Cl)cc3)c2ncn1C1CCCC1</chem>                              | 784192-19-4 | 20   | 10000 | 2005:1341997 |
| <chem>O=c1c2nn(c3ccccc3Cl)c(c3ccc(Cl)cc3)c2ncn1CC</chem>                                   | 784192-22-9 | 4    | 10000 | 2005:1341997 |
| <chem>O=c1c2nn(c3ccccc3Cl)c(c3ccc(Cl)cc3)c2ncn1CC(F)F</chem>                               | 784192-23-0 | 0.6  | 10000 | 2005:1341997 |
| <chem>O=c1c2nn(c3ccccc3Cl)c(c3ccc(Cl)cc3)c2ncn1CCF</chem>                                  | 784192-24-1 | 3    | 10000 | 2005:1341997 |

## Supporting Information

|                                                                            |             |      |       |              |
|----------------------------------------------------------------------------|-------------|------|-------|--------------|
| <chem>O=c1c2nn(c3ccccc3Cl)c(c3ccc(Cl)cc3)c2ncn1CCC</chem>                  | 784192-25-2 | 2    | 10000 | 2005:1341997 |
| <chem>O=c1c2nn(c3ccccc3Cl)c(c3ccc(Cl)cc3)c2ncn1CCC(F)(F)F</chem>           | 784192-27-4 | 1.8  | 10000 | 2005:1341997 |
| <chem>O=c1c2nn(c3ccccc3Cl)c(c3ccc(Cl)cc3)c2nc(CC)n1CC(F)(F)F</chem>        | 784192-59-2 | 1    | 10000 | 2005:1341997 |
| <chem>O=c1c2nn(c3ccccc3Cl)c(c3ccc(Cl)cc3)c2nc(C(C)C)n1CC(F)(F)F</chem>     | 784192-60-5 | 6    | 10000 | 2005:1341997 |
| <chem>O=c1c2nn(c3ccccc3Cl)c(c3ccc(Cl)cc3)c2nc(C)n1CC(F)(F)F</chem>         | 784192-63-8 | 0.6  | 10000 | 2005:1341997 |
| <chem>O=c1c2nn(c3ccccc3Cl)c(c3ccc(Cl)cc3)c2ccn1CC(F)(F)F</chem>            | 784192-98-9 | 1    | 10000 | 2005:1341997 |
| <chem>O=C(c1nc(c2ccc(Cl)cc2Cl)n(c2ccc(Cl)cc2)n1)NN1CCCC1</chem>            | 793666-99-6 | 356  | 3562  | 2004:790826  |
| <chem>O=C(c1c(C)n(c2ncc(Cl)cc2)c(c2ccc(Cl)cc2Cl)n1)NN1CCCC1</chem>         | 796875-29-1 | 55   | 758   | 2004:790826  |
| <chem>O=C(c1c(C)n(c2ccc(Cl)cc2)c(c2ccc(Cl)cc2Cl)n1)N1CC[C@H](O)CC1</chem>  | 796875-33-7 | 172  | 3959  | 2004:790826  |
| <chem>O=C(c1c(C)n(c2ccc(Cl)cc2)c(c2ccc(Cl)cc2Cl)n1)N1CCc2c(C1)cccc2</chem> | 796875-35-9 | 34   | 696   | 2004:790826  |
| <chem>O=C(c1c(C)n(c2ccc(Cl)cc2)c(c2ccc(Cl)cc2Cl)n1)N(CC)CC</chem>          | 796875-36-0 | 828  | 2520  | 2004:790826  |
| <chem>O=C(c1c(C)n(c2ccc(Cl)cc2)c(c2ccc(Cl)cc2Cl)n1)NN1CCCC1</chem>         | 796875-41-7 | 27   | 823   | 2004:790826  |
| <chem>O=C(c1c(Br)n(c2ccc(Cl)cc2)c(c2ccc(Cl)cc2Cl)n1)NN1CCCC1</chem>        | 796875-42-8 | 23   | 746   | 2004:790826  |
| <chem>O=C(c1ccc(C)c2c1cccc2)c1c2cccc2n(CCC)c1</chem>                       | 824955-98-8 | 1054 | 6.1   | 2004:1043347 |
| <chem>O=C(c1ccc(C)c2c1cccc2)c1c2cccc2n(CCC)c1C</chem>                      | 824955-99-9 | 123  | 14    | 2004:1043347 |
| <chem>O=C(c1ccc(CC)c2c1cccc2)c1c2cccc2n(CCC)c1</chem>                      | 824959-71-9 | 33   | 10    | 2004:1043347 |
| <chem>O=C(c1ccc(CC)c2c1cccc2)c1c2cccc2n(CCC)c1C</chem>                     | 824959-72-0 | 70   | 12    | 2004:1043347 |
| <chem>O=C(c1ccc(CC)c2c1cccc2)c1c2cccc2n(CCCCC)c1</chem>                    | 824959-81-1 | 0.46 | 0.69  | 2004:1043347 |
| <chem>O=C(c1ccc(CC)c2c1cccc2)c1c2cccc2n(CCCCC)c1C</chem>                   | 824959-83-3 | 1.5  | 0.42  | 2004:1043347 |
| <chem>O=C(c1c2cccc2n(CCC)c1)c1ccc(CCC)c2c1cccc2</chem>                     | 824959-87-7 | 26   | 9.6   | 2004:1043347 |
| <chem>O=C(c1c2cccc2n(CCC)c1C)c1ccc(CCC)c2c1cccc2</chem>                    | 824960-01-2 | 52   | 12    | 2004:1043347 |
| <chem>O=C(c1c2cccc2n(CCCCC)c1)c1ccc(CCC)c2c1cccc2</chem>                   | 824960-02-3 | 0.65 | 1.1   | 2004:1043347 |
| <chem>O=C(c1c2cccc2n(CCCCC)c1C)c1ccc(CCC)c2c1cccc2</chem>                  | 824960-03-4 | 1.3  | 0.62  | 2004:1043347 |
| <chem>O=C(c1ccc(CCCC)c2c1cccc2)c1c2cccc2n(CCC)c1</chem>                    | 824960-04-5 | 342  | 52    | 2004:1043347 |
| <chem>O=C(c1ccc(CCCC)c2c1cccc2)c1c2cccc2n(CCC)c1C</chem>                   | 824960-05-6 | 147  | 49    | 2004:1043347 |
| <chem>O=C(c1ccc(CCCC)c2c1cccc2)c1c2cccc2n(CCCCC)c1</chem>                  | 824960-06-7 | 14   | 7.2   | 2004:1043347 |
| <chem>O=C(c1ccc(CCCC)c2c1cccc2)c1c2cccc2n(CCCCC)c1C</chem>                 | 824960-07-8 | 42   | 6.5   | 2004:1043347 |
| <chem>O=C(c1cccc2c1cc(cc2)C)c1c2cccc2n(CCC)c1</chem>                       | 824960-09-0 | 214  | 106   | 2004:1043347 |

## Supporting Information

|                                                                     |             |       |      |              |
|---------------------------------------------------------------------|-------------|-------|------|--------------|
| <chem>O=C(c1cccc2c1cc(cc2)CC)c1c2ccccc2n(CCC)c1</chem>              | 824960-57-8 | 338   | 123  | 2004:1043347 |
| <chem>O=C(c1cccc2c1cc(cc2)CC)c1c2ccccc2n(CCC)c1C</chem>             | 824960-63-6 | 1351  | 240  | 2004:1043347 |
| <chem>O=C(c1cccc2c1cc(cc2)CC)c1c2ccccc2n(CCCCC)c1</chem>            | 824960-64-7 | 8.4   | 3.8  | 2004:1043347 |
| <chem>O=C(c1cccc2c1cc(cc2)CC)c1c2ccccc2n(CCCCC)c1C</chem>           | 824960-71-6 | 28    | 5.6  | 2004:1043347 |
| <chem>O=C(c1c(OC)ccc2c1cccc2)c1c2ccccc2n(CCC)c1</chem>              | 824960-73-8 | 3788  | 80   | 2004:1043347 |
| <chem>O=C(c1c(OC)ccc2c1cccc2)c1c2ccccc2n(CCC)c1C</chem>             | 824960-74-9 | 10000 | 455  | 2004:1043347 |
| <chem>O=C(c1c(OC)ccc2c1cccc2)c1c2ccccc2n(CCCCC)c1</chem>            | 824960-76-1 | 381   | 7.2  | 2004:1043347 |
| <chem>O=C(c1ccc(OCC)c2c1cccc2)c1c2ccccc2n(CCC)c1</chem>             | 824960-95-4 | 220   | 74   | 2004:1043347 |
| <chem>O=C(c1ccc(OCC)c2c1cccc2)c1c2ccccc2n(CCC)c1C</chem>            | 824960-96-5 | 767   | 221  | 2004:1043347 |
| <chem>O=C(c1ccc(OCC)c2c1cccc2)c1c2ccccc2n(CCCCC)c1</chem>           | 824960-97-6 | 4.6   | 10.5 | 2004:1043347 |
| <chem>O=C(c1ccc(OCC)c2c1cccc2)c1c2ccccc2n(CCCCC)c1C</chem>          | 824960-98-7 | 29    | 25   | 2004:1043347 |
| <chem>O=C(c1cccc2c1ccc(c2)OC)c1c2ccccc2n(CCC)c1</chem>              | 824961-06-0 | 2358  | 138  | 2004:1043347 |
| <chem>O=C(c1cccc2c1ccc(c2)OC)c1c2ccccc2n(CCC)c1C</chem>             | 824961-23-1 | 10000 | 30   | 2004:1043347 |
| <chem>O=C(c1cccc2c1ccc(c2)OC)c1c2ccccc2n(CCCCC)c1</chem>            | 824961-41-3 | 44    | 1.9  | 2004:1043347 |
| <chem>O=C(c1cccc2c1ccc(c2)OC)c1c2ccccc2n(CCCCC)c1C</chem>           | 824961-58-2 | 250   | 11   | 2004:1043347 |
| <chem>O=C(c1cccc2c1cc(cc2)OC)c1c2ccccc2n(CCC)c1</chem>              | 824961-59-3 | 204   | 71   | 2004:1043347 |
| <chem>O=C(c1cccc2c1cc(cc2)OC)c1c2ccccc2n(CCC)c1C</chem>             | 824961-60-6 | 1568  | 441  | 2004:1043347 |
| <chem>O=C(c1cccc2c1cc(cc2)OC)c1c2ccccc2n(CCCCC)c1</chem>            | 824961-61-7 | 6.6   | 6.9  | 2004:1043347 |
| <chem>O=C(c1cccc2c1cc(cc2)OC)c1c2ccccc2n(CCCCC)c1C</chem>           | 824961-62-8 | 45    | 10.4 | 2004:1043347 |
| <chem>Oc1cc(C(C)(C)CCCC)ccc1[C@@H]1[C@@H](CCCO)CC[C@H](O)C1</chem>  | 83002-05-5  | 61.66 | 23.4 | 2000:338367  |
| <chem>CC1=C[C@@H]2c3c(OC)cc(C(C)(C)CCCC)cc3OC(C)(C)[C@H]2CC1</chem> | 832111-99-6 | 3134  | 18   | 2004:1043347 |
| <chem>O=C(c1c2CCc3cc(Cl)ccc3c2n(c2ccc(Cl)cc2Cl)n1)NN1CCCCC1</chem>  | 852409-27-9 | 14.8  | 227  | 2005:288981  |
| <chem>O=C(c1c2CCc3cc(C)ccc3c2n(c2ccc(Cl)cc2Cl)n1)NN1CCCCC1</chem>   | 852409-28-0 | 5.88  | 287  | 2005:288981  |
| <chem>O=C(c1c2CCc3cc(Br)ccc3c2n(c2ccc(Cl)cc2Cl)n1)NN1CCCCC1</chem>  | 852409-29-1 | 4.87  | 367  | 2005:288981  |
| <chem>O=C(c1c2CCc3cc(I)ccc3c2n(c2ccc(Cl)cc2Cl)n1)NN1CCCCC1</chem>   | 852409-30-4 | 4.11  | 1079 | 2005:288981  |
| <chem>O=C(c1c2CCc3cccc3c2n(c2ccc(Cl)cc2Cl)n1)NN1CCCCC1</chem>       | 852409-31-5 | 602   | 295  | 2005:288981  |
| <chem>O=C(c1c2CCc3cc(Cl)ccc3c2n(c2ccc(Cl)cc2)n1)NN1CCCCC1</chem>    | 852409-32-6 | 142   | 550  | 2005:288981  |
| <chem>O=C(c1c2CCc3cc(Cl)ccc3c2n(c2ccccc2)n1)NN1CCCCC1</chem>        | 852409-33-7 | 418   | 1375 | 2005:288981  |



## Supporting Information

|                                                                                                      |             |      |       |              |
|------------------------------------------------------------------------------------------------------|-------------|------|-------|--------------|
| <chem>O=C(c1c2CCc3cc(Cl)ccc3c2n(c2ccc(OC)cc2)n1)NN1CCCC1</chem>                                      | 852409-34-8 | 157  | 1875  | 2005:288981  |
| <chem>O=C(c1c2CCc3cc(Cl)ccc3c2n(c2ccc(Cl)cc2Cl)n1)NN1CCCC1</chem>                                    | 852409-35-9 | 49   | 387   | 2005:288981  |
| <chem>O=c1c2nn(c3ccccc3Cl)c(c3ccc(Cl)cc3)c2cnn1CC(F)(F)F</chem>                                      | 857075-03-7 | 8    | 10000 | 2005:1341997 |
| <chem>Oc1c2[C@@H]3[C@H](CC=C(C)C3)C(C)(C)Oc2cc([C@@H]2[C@@H]3C[C@H]4C[C@@H](C3)C[C@@H]2C4)c1</chem>  | 862075-65-8 | 34.9 | 14    | 2005:529462  |
| <chem>Oc1c2[C@@H]3[C@H](CC=C(C)C3)C(C)(C)Oc2cc(/C=C\2/[C@@H]3C[C@H]4C[C@@H](C3)C[C@@H]2C4)c1</chem>  | 862075-66-9 | 48.6 | 8.9   | 2005:529462  |
| <chem>Oc1c2[C@@H]3[C@H](CC=C(C)C3)C(C)(C)Oc2cc(C[C@@H]2[C@@H]3C[C@H]4C[C@@H](C3)C[C@@H]2C4)c1</chem> | 862075-67-0 | 79.7 | 76    | 2005:529462  |
| <chem>CCCCn1c(C)c(C(=O)Cc2ccccc2F)c2c1cccc2</chem>                                                   | 864382-14-9 | 39   | 76    | 2005:760362  |
| <chem>CCCCn1cc(C(=O)Cc2ccccc2)c2c1cccc2</chem>                                                       | 864445-37-4 | 90   | 159   | 2005:760362  |
| <chem>CCCCn1c(C)c(C(=O)Cc2ccccc2)c2c1cccc2</chem>                                                    | 864445-38-5 | 124  | 180   | 2005:760362  |
| <chem>CCCCn1cc(C(=O)Cc2ccccc2)c2c1cccc2</chem>                                                       | 864445-39-6 | 29   | 146   | 2005:760362  |
| <chem>Cc1ccccc1CC(=O)c1c2ccccc2n(CCCC)c1C</chem>                                                     | 864445-40-9 | 23   | 19    | 2005:760362  |
| <chem>CCCCn1cc(C(=O)Cc2ccc(C)cc2)c2c1cccc2</chem>                                                    | 864445-41-0 | 179  | 570   | 2005:760362  |
| <chem>Cc1ccc(CC(=O)c2c3ccccc3n(CCCC)c2C)cc1</chem>                                                   | 864445-42-1 | 746  | 1353  | 2005:760362  |
| <chem>CCCCn1cc(C(=O)Cc2ccccc2OC)c2c1cccc2</chem>                                                     | 864445-43-2 | 11   | 33    | 2005:760362  |
| <chem>CCCCn1c(C)c(C(=O)Cc2ccccc2OC)c2c1cccc2</chem>                                                  | 864445-44-3 | 25   | 82    | 2005:760362  |
| <chem>CCCCn1cc(C(=O)Cc2cccc(OC)c2)c2c1cccc2</chem>                                                   | 864445-45-4 | 17   | 89    | 2005:760362  |
| <chem>CCCCn1c(C)c(C(=O)Cc2cccc(OC)c2)c2c1cccc2</chem>                                                | 864445-46-5 | 62   | 84    | 2005:760362  |
| <chem>CCCCn1cc(C(=O)Cc2ccc(OC)cc2)c2c1cccc2</chem>                                                   | 864445-47-6 | 1064 | 444   | 2005:760362  |
| <chem>CCCCn1c(C)c(C(=O)Cc2ccc(OC)cc2)c2c1cccc2</chem>                                                | 864445-48-7 | 1678 | 645   | 2005:760362  |
| <chem>CCCCn1cc(C(=O)Cc2ccccc2F)c2c1cccc2</chem>                                                      | 864445-49-8 | 23   | 39    | 2005:760362  |
| <chem>CCCCn1cc(C(=O)Cc2cccc(F)c2)c2c1cccc2</chem>                                                    | 864445-50-1 | 72   | 91    | 2005:760362  |
| <chem>CCCCn1c(C)c(C(=O)Cc2cccc(F)c2)c2c1cccc2</chem>                                                 | 864445-51-2 | 430  | 182   | 2005:760362  |
| <chem>CCCCn1cc(C(=O)Cc2ccc(F)cc2)c2c1cccc2</chem>                                                    | 864445-52-3 | 422  | 365   | 2005:760362  |
| <chem>CCCCn1c(C)c(C(=O)Cc2ccc(F)cc2)c2c1cccc2</chem>                                                 | 864445-53-4 | 2862 | 781   | 2005:760362  |
| <chem>CCCCn1cc(C(=O)Cc2ccccc2Cl)c2c1cccc2</chem>                                                     | 864445-54-5 | 8    | 7     | 2005:760362  |
| <chem>CCCCn1c(C)c(C(=O)Cc2ccccc2Cl)c2c1cccc2</chem>                                                  | 864445-55-6 | 13   | 25    | 2005:760362  |
| <chem>CCCCn1cc(C(=O)Cc2cccc(Cl)c2)c2c1cccc2</chem>                                                   | 864445-56-7 | 38   | 106   | 2005:760362  |
| <chem>CCCCn1c(C)c(C(=O)Cc2cccc(Cl)c2)c2c1cccc2</chem>                                                | 864445-57-8 | 117  | 138   | 2005:760362  |

## Supporting Information

|                                                                  |             |        |      |              |
|------------------------------------------------------------------|-------------|--------|------|--------------|
| CCCCn1cc(C(=O)Cc2ccc(Cl)cc2)c2c1cccc2                            | 864445-58-9 | 389    | 498  | 2005:760362  |
| CCCCn1c(C)c(C(=O)Cc2ccc(Cl)cc2)c2c1cccc2                         | 864445-59-0 | 1598   | 3723 | 2005:760362  |
| CCCCn1cc(C(=O)Cc2ccccc2Br)c2c1cccc2                              | 864445-60-3 | 8.4    | 20   | 2005:760362  |
| CCCCn1c(C)c(C(=O)Cc2ccccc2Br)c2c1cccc2                           | 864445-61-4 | 15     | 29   | 2005:760362  |
| CCCCn1cc(C(=O)Cc2ccc(Br)cc2)c2c1cccc2                            | 864445-62-5 | 1028   | 657  | 2005:760362  |
| CCCCn1c(C)c(C(=O)Cc2ccc(Br)cc2)c2c1cccc2                         | 864445-63-6 | 3363   | 2679 | 2005:760362  |
| O=C(NC1CC1)CCC/C=C\C/C=C\C/C=C\C/C=C\C\CCCCN=C=S                 | 867280-98-6 | 1.3    | 48.5 | 2005:990496  |
| O=C(NC1CC1)CCC/C=C\C/C=C\C/C=C\C/C=C\C\CCCCN=[N+]=[N-]           | 867281-00-3 | 0.9    | 57.6 | 2005:990496  |
| O=C(c1c2ccc(l)cc2n(C[C@H]2N(C)CCCC2)c1)c1cccc2c1cccc2            | 868542-00-1 | 18     | 9.8  | 2005:980153  |
| O=C(c1ccc(l)c2c1cccc2)c1c2ccccc2n(C[C@H]2N(C)CCCC2)c1            | 868542-03-4 | 10     | 5.3  | 2005:980153  |
| O=C(c1cccc1)c1c2ccccc2n(C[C@H]2N(C)CCCC2)c1C                     | 868542-05-6 | 34     | 34   | 2005:980153  |
| O=C(c1cccc(l)c1)c1c2ccccc2n(C[C@H]2N(C)CCCC2)c1C                 | 868542-06-7 | 2900   | 9600 | 2005:980153  |
| O=C(c1ccc(l)cc1)c1c2ccccc2n(C[C@H]2N(C)CCCC2)c1C                 | 868542-07-8 | 1800   | 790  | 2005:980153  |
| O=C(c1cccc1)c1c2ccccc2n(C[C@H]2N(C)CCCC2)c1C                     | 868542-08-9 | 6.7    | 10   | 2005:980153  |
| O=C(c1cccc1)c1c2ccccc2n(C[C@H]2N(C)CCCC2)c1C                     | 868542-09-0 | 1200   | 83   | 2005:980153  |
| C/N=C(/N1N=C(c2ccc(Cl)cc2)[C@@H](c2ccccc2)C1)\NS(=O)(=O)N1CCCCC1 | 869278-54-6 | 155    | 1032 | 2005:1024928 |
| O=S(=O)(/N=C(/N1N=C(c2ccc(Cl)cc2)[C@@H](c2ccccc2)C1)\NC)N1CCSCC1 | 869278-55-7 | 24     | 3526 | 2005:1024928 |
| O=S(=O)(/N=C(/N1N=C(c2ccc(Cl)cc2)[C@@H](c2ccccc2)C1)\NC)N1CCOCC1 | 869278-56-8 | 75     | 5372 | 2005:1024928 |
| O=C(c1nn(c2ccc(Cl)cc2Cl)c2c1CCCc1cc(Cl)ccc21)NN1CCCC1            | 870679-33-7 | 0.004  | 45   | 2005:1118017 |
| O=C(c1nn(c2ccc(Cl)cc2Cl)c2c1CCCc1cc(Cl)ccc21)NC1CCCC1            | 870679-34-8 | 0.3    | 0.65 | 2005:1118017 |
| O=C(c1nn(c2ccc(Cl)cc2Cl)c2c1CCCc1cc(Cl)ccc21)Nc1cccc1            | 870679-35-9 | 4.35   | 1.45 | 2005:1118017 |
| O=C(c1nn(c2ccc(Cl)cc2Cl)c2c1CCCc1cc(Cl)ccc21)Nc1ccc(Cl)cc1       | 870679-36-0 | 2.5    | 79   | 2005:1118017 |
| O=C(c1nn(c2ccc(Cl)cc2Cl)c2c1CCCc1cc(Cl)ccc21)Nc1ccc(Cl)c(Cl)c1   | 870679-37-1 | 25.83  | 500  | 2005:1118017 |
| O=C(c1nn(c2ccc(Cl)cc2Cl)c2c1CCCc1cc(Cl)ccc21)Nc1ccc(C)cc1        | 870679-38-2 | 5.74   | 65   | 2005:1118017 |
| O=C(c1nn(c2ccc(Cl)cc2Cl)c2c1CCCc1cc(Cl)ccc21)Nc1ccc(OC)cc1       | 870679-39-3 | 0.013  | 43.3 | 2005:1118017 |
| O=C(c1nn(c2ccc(Cl)cc2Cl)c2c1CCCc1c(Cl)ccc21)NN1CCCC1             | 870679-40-6 | 9.84   | 31.6 | 2005:1118017 |
| O=C(c1nn(c2ccc(Cl)cc2Cl)c2c1CCCc1cc(Br)ccc21)NN1CCCC1            | 870679-41-7 | 0.008  | 37   | 2005:1118017 |
| O=C(c1nn(c2ccc(Cl)cc2Cl)c2c1CCCc1cc(C)ccc21)NN1CCCC1             | 870679-42-8 | 0.0052 | 0.46 | 2005:1118017 |

# Supporting Information

|                                                                |             |       |       |              |
|----------------------------------------------------------------|-------------|-------|-------|--------------|
| O=C(c1nn(c2ccc(Cl)cc2Cl)c2c1CCc1cc(C)ccc21)NN1CCCC1            | 870679-43-9 | 0.11  | 386   | 2005:1118017 |
| CC(C)Cc1cc2c([C@@H]3[C@H](CC=C(C)C3)C(C)(C)O2)cc1              | 873428-27-4 | 10000 | 111   | 2005:1233246 |
| CC(C)Cc1cc2c([C@@H]3[C@H](CC=C(C)C3)C(C)(C)O2)c(OC)c1          | 873428-28-5 | 10000 | 2317  | 2005:1233246 |
| CC[C@H](C)Cc1cc2c([C@@H]3[C@H](CC=C(C)C3)C(C)(C)O2)c(OC)c1     | 873428-30-9 | 10000 | 295   | 2005:1233246 |
| CC[C@H](C)Cc1cc2c([C@@H]3[C@H](CC=C(C)C3)C(C)(C)O2)cc1         | 873428-44-5 | 2449  | 160   | 2005:1233246 |
| CCC[C@H](C)Cc1cc2c([C@@H]3[C@H](CC=C(C)C3)C(C)(C)O2)c(OC)c1    | 873428-46-7 | 4724  | 319   | 2005:1233246 |
| CCCC[C@H](C)Cc1cc2c([C@@H]3[C@H](CC=C(C)C3)C(C)(C)O2)cc1       | 873428-49-0 | 2162  | 108   | 2005:1233246 |
| CCCCC[C@H](C)Cc1cc2c([C@@H]3[C@H](CC=C(C)C3)C(C)(C)O2)cc1      | 873428-50-3 | 647   | 185   | 2005:1233246 |
| CCCC[C@H](C)Cc1cc2c([C@@H]3[C@H](CC=C(C)C3)C(C)(C)O2)cc1       | 873428-53-6 | 25    | 1     | 2005:1233246 |
| CCCCC[C@H](C)Cc1cc2c([C@@H]3[C@H](CC=C(C)C3)C(C)(C)O2)cc1      | 873428-56-9 | 332   | 146   | 2005:1233246 |
| CCC[C@H](C)Cc1cc2c([C@@H]3[C@H](CC=C(C)C3)C(C)(C)O2)c(OC)c1    | 873428-58-1 | 1961  | 241   | 2005:1233246 |
| CCCC[C@H](C)Cc1cc2c([C@@H]3[C@H](CC=C(C)C3)C(C)(C)O2)c(OC)c1   | 873428-61-6 | 5837  | 108   | 2005:1233246 |
| CCCCC[C@H](C)Cc1cc2c([C@@H]3[C@H](CC=C(C)C3)C(C)(C)O2)c(OC)c1  | 873428-63-8 | 1243  | 52    | 2005:1233246 |
| CCCC[C@H](C)Cc1cc2c([C@@H]3[C@H](CC=C(C)C3)C(C)(C)O2)c(OC)c1   | 873428-65-0 | 4300  | 97    | 2005:1233246 |
| CCCCC[C@H](C)Cc1cc2c([C@@H]3[C@H](CC=C(C)C3)C(C)(C)O2)c(OC)c1  | 873428-67-2 | 427   | 99    | 2005:1233246 |
| CCCCC/C=C\C/C=C\C/C=C\C/C=C\C\CCCC(=O)NCc1cc(OC)ccc1OC         | 873549-75-8 | 500   | 4100  | 2005:1241404 |
| CCCCC/C=C\C/C=C\C/C=C\C/C=C\C\CCCC(=O)NCc1ccc(OC)cc1OC         | 873549-76-9 | 200   | 4000  | 2005:1241404 |
| CCCCC/C=C\C/C=C\C/C=C\C/C=C\C\CCCC(=O)N1CCN(c2ccc(C)c(C)C2)CC1 | 873549-77-0 | 400   | 4200  | 2005:1241404 |
| CCCCC/C=C\C/C=C\C/C=C\C/C=C\C\CCCC(=O)N1CCN(c2ccc(Cl)cc2)CC1   | 873549-78-1 | 600   | 10000 | 2005:1241404 |
| CCCCC/C=C\C/C=C\C/C=C\C/C=C\C\CCCC(=O)N1CCN(c2ccc(F)cc2)CC1    | 873549-79-2 | 300   | 5100  | 2005:1241404 |
| CCCCCCCC/C=C/C(=O)Nc1ccc(OC)cc1                                | 873549-80-5 | 4900  | 2500  | 2005:1241404 |
| CCCCCCCC/C=C/C(=O)NCCc1ccc(OC)cc1                              | 873549-82-7 | 2400  | 5100  | 2005:1241404 |
| CCCCCCCC/C=C/C(=O)NCCc1cc(OC)cc(OC)c1                          | 873549-83-8 | 2800  | 5200  | 2005:1241404 |
| CCCCCCCC/C=C\C\CCCCCCCCCCCC(=O)NCCc1c(OC)cc(OC)cc1             | 873549-94-1 | 3700  | 10000 | 2005:1241404 |
| CCCCCCCC/C=C\C\CCCCCCCCCCCC(=O)Nc1ccc(N2CCOCC2)cc1             | 873549-95-2 | 6400  | 10000 | 2005:1241404 |
| CCCCCCCC/C=C\C\CCCCCCCC(=O)Nc1ccc(OC)cc1                       | 873549-96-3 | 1600  | 10000 | 2005:1241404 |
| CCCCCCCC/C=C\C\CCCCCCCC(=O)NCc1ccc(OC)cc1                      | 873549-97-4 | 500   | 10000 | 2005:1241404 |
| CCCCCCCC/C=C\C\CCCCCCCC(=O)NCCc1ccc(OC)cc1                     | 873549-98-5 | 400   | 10000 | 2005:1241404 |

## Supporting Information

|                                                                            |             |       |       |              |
|----------------------------------------------------------------------------|-------------|-------|-------|--------------|
| CCCCCCCC/C=C\CCCCCCCC(=O)NCCc1cc(OC)cc(OC)c1                               | 873549-99-6 | 1300  | 10000 | 2005:1241404 |
| CCCCCCCC/C=C\CCCCCCCC(=O)NCCc1ccc(OC)cc1OC                                 | 873550-00-6 | 800   | 10000 | 2005:1241404 |
| CCCCC/C=C\C/C=C\C/C=C\C/C=C\C\CCCC(=O)NCCc1ccc(OC)cc1                      | 873550-02-8 | 600   | 4500  | 2005:1241404 |
| CCCCC/C=C\C/C=C\C/C=C\C/C=C\C\CCCC(=O)NCCc1ccc(OC)cc1                      | 873550-03-9 | 2400  | 10000 | 2005:1241404 |
| CCCCC/C=C\C/C=C\C/C=C\C/C=C\C\CCCC(=O)NCCc1ccc(OC)cc1OC                    | 873550-05-1 | 500   | 4000  | 2005:1241404 |
| CCCCC/C=C\C/C=C\C/C=C\C/C=C\C\CCCC(=O)Nc1ccc(N2CCOCC2)cc1                  | 873550-06-2 | 150   | 4300  | 2005:1241404 |
| CC[C@H](C)Cc1cc2c([C@@H]3[C@H](CC=C(C)C3)C(C)(C)O2)cc1                     | 873556-64-0 | 10000 | 47    | 2005:1233246 |
| CC[C@H](C)Cc1cc2c([C@@H]3[C@H](CC=C(C)C3)C(C)(C)O2)c(OC)c1                 | 873556-69-5 | 2918  | 13    | 2005:1233246 |
| CCC[C@H](C)Cc1cc2c([C@@H]3[C@H](CC=C(C)C3)C(C)(C)O2)cc1                    | 873556-71-9 | 4307  | 24    | 2005:1233246 |
| CCC[C@H](C)Cc1cc2c([C@@H]3[C@H](CC=C(C)C3)C(C)(C)O2)cc1                    | 873556-72-0 | 1493  | 31    | 2005:1233246 |
| O=C(c1c(=O)c2c(n(c1)CCCC)cccc2)Nc1cccc2c1cccc2                             | 875148-81-5 | 4083  | 371   | 2005:1298759 |
| O=C(c1c(=O)c2c(n(c1)CCCC)cccc2)N[C@@H]1[C@@H]2C[C@H]3C[C@@H](C2)C[C@@H]1C3 | 875148-95-1 | 1925  | 13.4  | 2005:1298759 |
| O=C(c1c(=O)c2c(n(c1)CCCC)cccc2)N[C@H]1CCCC2c1cccc2                         | 875149-01-2 | 1045  | 60.2  | 2005:1298759 |
| O=c1c2nn(c3ccc(Cl)cc3)c(c3cccc3Cl)c2ncn1N1CCCC1                            | 876405-86-6 | 12    | 10000 | 2005:1341997 |
| O=c1c2nn(c3cccc3Cl)c(c3ccc(Cl)cc3)c2ncn1Cc1cccc1                           | 876405-87-7 | 5     | 10000 | 2005:1341997 |
| O=c1c2nn(c3cccc3Cl)c(c3ccc(Cl)cc3)c2ncn1CC(F)(F)C                          | 876405-88-8 | 0.2   | 10000 | 2005:1341997 |
| O=c1c2nn(c3ccc(Cl)cc3)c(c3cccc3Cl)c2ncn1C1CCCC1                            | 876405-89-9 | 38    | 10000 | 2005:1341997 |
| O=c1c2nn(c3ccc(Cl)cc3)c(c3cccc3Cl)c2ncn1CC(F)(F)F                          | 876405-90-2 | 28    | 10000 | 2005:1341997 |
| Oc1c([C@@H]2C=C(C)CC[C@H]2C(=C)C)c(O)cc(c2ccc(C)cc2)c1                     | 881888-24-0 | 638.1 | 374.4 | 2006:128508  |
| Oc1cc(c2ccc3c2ccc3)cc(O)c1[C@@H]1C=C(C)CC[C@H]1C(=C)C                      | 881888-27-3 | 753.5 | 221.6 | 2006:128508  |
| Oc1c2[C@@H]3[C@H](CCC(=C3)C)C(C)(C)Oc2cc(c2ccc(C)cc2)c1                    | 881888-28-4 | 95.49 | 71.81 | 2006:128508  |
| Oc1c2[C@@H]3[C@H](CCC(=C3)C)C(C)(C)Oc2cc(c2ccc(CC)cc2)c1                   | 881888-29-5 | 119   | 51.7  | 2006:128508  |
| Oc1c2[C@@H]3[C@H](CCC(=C3)C)C(C)(C)Oc2cc(c2ccc(CCC)cc2)c1                  | 881888-30-8 | 57.77 | 107.8 | 2006:128508  |
| Oc1c2[C@@H]3[C@H](CCC(=C3)C)C(C)(C)Oc2cc(c2ccc3c2ccc3)c1                   | 881888-31-9 | 11.73 | 9.39  | 2006:128508  |
| N#CC1(c2cc(O)c([C@@H]3C=C(C)CC[C@H]3C(=C)C)c(O)c2)CCCC1                    | 881888-34-2 | 255.4 | 105   | 2006:128508  |
| N#CC1(c2cc(O)c([C@@H]3C=C(C)CC[C@H]3C(=C)C)c(O)c2)CCCC1                    | 881888-35-3 | 319   | 110.7 | 2006:128508  |
| N#CC1(c2cc3c([C@@H]4[C@H](CCC(=C4)C)C(C)(C)O3)c(O)c2)CCCC1                 | 881888-36-4 | 27.9  | 25.2  | 2006:128508  |
| N#CC1(c2cc3c([C@@H]4[C@H](CCC(=C4)C)C(C)(C)O3)c(O)c2)CCCC1                 | 881888-37-5 | 8.26  | 3.86  | 2006:128508  |

## Supporting Information

|                                                                            |             |       |      |             |
|----------------------------------------------------------------------------|-------------|-------|------|-------------|
| O[C@@H]1C[C@H]2[C@H](CC1)C(Oc1c2c(OC)cc(C(C)(C)CCCC)c1)(C)C                | 883111-53-3 | 812   | 198  | 2006:156948 |
| O[C@@H]1C[C@H]2[C@H](CC1)C(Oc1c2c(OC)cc(C(C)(C)CCCC)c1)(C)C                | 883111-54-4 | 415   | 30   | 2006:156948 |
| O[C@@H]1C[C@H]2[C@H](CC1)C(Oc1c2c(OC)cc(C(C)(C)CCCC)c1)(C)C                | 883111-55-5 | 395   | 12   | 2006:156948 |
| O[C@@H]1C[C@H]2[C@H](CC1)C(Oc1c2c(OC)cc(C(C)(C)CCCC)c1)(C)C                | 883111-56-6 | 100   | 10   | 2006:156948 |
| O[C@@H]1C[C@H]2[C@H](CC1)C(Oc1c2ccc(C(C)(C)CCC)c1)(C)C                     | 883111-57-7 | 1059  | 36   | 2006:156948 |
| O[C@@H]1C[C@H]2[C@H](CC1)C(Oc1c2ccc(C(C)(C)CCCC)c1)(C)C                    | 883111-58-8 | 118   | 5.3  | 2006:156948 |
| O[C@@H]1C[C@H]2[C@H](CC1)C(Oc1c2ccc(C(C)(C)CCCC)c1)(C)C                    | 883111-59-9 | 63    | 2.7  | 2006:156948 |
| O[C@@H]1C[C@H]2[C@H](CC1)C(Oc1c2c(OC)cc(C(C)(C)CCC)c1)(C)C                 | 883111-60-2 | 3905  | 589  | 2006:156948 |
| O[C@@H]1C[C@H]2[C@H](CC1)C(Oc1c2c(OC)cc(C(C)(C)CCCC)c1)(C)C                | 883111-61-3 | 906   | 69   | 2006:156948 |
| O[C@@H]1C[C@H]2[C@H](CC1)C(Oc1c2c(OC)cc(C(C)(C)CCCC)c1)(C)C                | 883111-62-4 | 376   | 38   | 2006:156948 |
| O[C@@H]1C[C@H]2[C@H](CC1)C(Oc1c2c(OC)cc(C(C)(C)CCCC)c1)(C)C                | 883111-63-5 | 135   | 30   | 2006:156948 |
| O[C@@H]1C[C@H]2[C@H](CC1)C(Oc1c2ccc(C(C)(C)CCC)c1)(C)C                     | 883111-64-6 | 4589  | 153  | 2006:156948 |
| O[C@@H]1C[C@H]2[C@H](CC1)C(Oc1c2ccc(C(C)(C)CCCC)c1)(C)C                    | 883111-65-7 | 295   | 48   | 2006:156948 |
| O[C@@H]1C[C@H]2[C@H](CC1)C(Oc1c2ccc(C(C)(C)CCCC)c1)(C)C                    | 883111-67-9 | 127   | 34   | 2006:156948 |
| CCCC/C=C\C/C=C\C/C=C\C/C=C\C\CCCC(=O)NOCCO                                 | 883296-70-6 | 470   | 81   | 2006:165889 |
| CCCC/C=C\C/C=C\C/C=C\C/C=C\C\CCCC(=O)N(O)CCO                               | 883296-89-7 | 3900  | 1900 | 2006:165889 |
| CCCCCCCC/C=C\CCCCCCCC(=O)N(O)CCO                                           | 883296-93-3 | 10000 | 5400 | 2006:165889 |
| CCCC/C=C\C/C=C\C/C=C\C/C=C\C\CCCC(=O)ONCCO                                 | 883297-02-7 | 3500  | 2400 | 2006:165889 |
| CCCCCCCC/C=C\CCCCCCCC(=O)ONCCO                                             | 883297-06-1 | 10000 | 8600 | 2006:165889 |
| Oc1cc(C(C)(C)CCCC)ccc1c1ccnc1                                              | 895131-92-7 | 23    | 20   | 2007:652168 |
| O=C(OCC/C=C\C/C=C\C/C=C\C/C=C\C\CCCC(=O)N[C@H](C)CO)c1cc(l)ccc1N=[N+]=[N-] | 903514-40-9 | 570   | 220  | 2006:548780 |
| O=C(c1ccc2n(CCN(C)C)c(Cc3ccc4OCCc4c3)nc2c1)N(CC)CC                         | 909706-33-8 | 5000  | 876  | 2006:665189 |
| O=C(c1ccc2n(CCO)c(Cc3ccc4OCCc4c3)nc2c1)N(CC)CC                             | 909706-34-9 | 5000  | 1259 | 2006:665189 |
| O=C(c1ccc2n(CCC3CC3)c(Cc3ccc4OCCc4c3)nc2c1)N(CC)CC                         | 909706-35-0 | 5000  | 84   | 2006:665189 |
| O=C(c1ccc2n(CCC3CCCC3)c(Cc3ccc4OCCc4c3)nc2c1)N(CC)CC                       | 909706-36-1 | 3220  | 6.8  | 2006:665189 |
| O=C(c1ccc2n(CCC3CCCC3)c(Cc3ccc4OCCc4c3)nc2c1)N(CC)CC                       | 909706-37-2 | 844   | 8.1  | 2006:665189 |
| O=C(c1ccc2n(C[C@H]3NCCCC3)c(Cc3ccc4OCCc4c3)nc2c1)N(CC)CC                   | 909706-39-4 | 5000  | 199  | 2006:665189 |
| O=C(c1ccc2n(CCC3COCC3)c(Cc3ccc4OCCc4c3)nc2c1)N(CC)CC                       | 909706-40-7 | 5000  | 8.5  | 2006:665189 |

## Supporting Information

|                                                                             |             |       |      |             |
|-----------------------------------------------------------------------------|-------------|-------|------|-------------|
| <chem>O=C(c1ccc2n(Cc3ccccc3)c(Cc3ccc4OCCc4c3)nc2c1)N(CC)CC</chem>           | 909706-41-8 | 5000  | 11   | 2006:665189 |
| <chem>O=C(c1ccc2n(Cc3sccc3)c(Cc3ccc4OCCc4c3)nc2c1)N(CC)CC</chem>            | 909706-42-9 | 5000  | 14   | 2006:665189 |
| <chem>O=C(c1ccc2n(Cc3ccncc3)c(Cc3ccc4OCCc4c3)nc2c1)N(CC)CC</chem>           | 909706-43-0 | 5000  | 154  | 2006:665189 |
| <chem>CC(C)CCn1c(Cc2ccc3OCCc3c2)nc2cc(NC)ccc12</chem>                       | 909706-46-3 | 5000  | 2267 | 2006:665189 |
| <chem>CC(C)(C)C(=O)N(c1ccc2n(CCC(C)C)c(Cc3ccc4OCCc4c3)nc2c1)C</chem>        | 909706-49-6 | 5000  | 52   | 2006:665189 |
| <chem>CC(C)(C)C(=O)Nc1ccc2n(CCC(C)C)c(Cc3ccc4OCCc4c3)nc2c1</chem>           | 909706-50-9 | 5000  | 4578 | 2006:665189 |
| <chem>O=C(N(c1ccc2n(CCC(C)C)c(Cc3ccc4OCCc4c3)nc2c1)C)c1ccccc1</chem>        | 909706-51-0 | 4511  | 85   | 2006:665189 |
| <chem>O=C(c1sccc1)N(c1ccc2n(CCC(C)C)c(Cc3ccc4OCCc4c3)nc2c1)C</chem>         | 909706-52-1 | 1030  | 49   | 2006:665189 |
| <chem>O=C(N(C)C)N(c1ccc2n(CCC(C)C)c(Cc3ccc4OCCc4c3)nc2c1)C</chem>           | 909706-54-3 | 5000  | 122  | 2006:665189 |
| <chem>O=C(Nc1ccccc1)N(c1ccc2n(CCC(C)C)c(Cc3ccc4OCCc4c3)nc2c1)C</chem>       | 909706-56-5 | 5000  | 1880 | 2006:665189 |
| <chem>S=C(Nc1ccccc1)N(c1ccc2n(CCC(C)C)c(Cc3ccc4OCCc4c3)nc2c1)C</chem>       | 909706-57-6 | 5000  | 521  | 2006:665189 |
| <chem>CC(C)CCn1c(Cc2ccc3OCCc3c2)nc2cc(N(C)Cc3ccccc3)ccc12</chem>            | 909706-58-7 | 2884  | 103  | 2006:665189 |
| <chem>O=S(=O)(c1ccccc1)N(c1ccc2n(CCC(C)C)c(Cc3ccc4OCCc4c3)nc2c1)C</chem>    | 909706-59-8 | 822   | 4.2  | 2006:665189 |
| <chem>O=S(=O)(c1ccccc1)Nc1ccc2n(CCC(C)C)c(Cc3ccc4OCCc4c3)nc2c1</chem>       | 909706-60-1 | 3531  | 30   | 2006:665189 |
| <chem>O=S(=O)(c1ccccc1)N(c1ccc2n(CC3CCCC3)c(Cc3ccc4OCCc4c3)nc2c1)C</chem>   | 909706-61-2 | 16    | 0.7  | 2006:665189 |
| <chem>O=C(c1c(=O)c2c(n(c1)Cc1ccc(F)cc1)nc(cc2)C)N[C@H]1CC[C@H](C)CC1</chem> | 913533-80-9 | 8.7   | 1.4  | 2006:908608 |
| <chem>O=C(c1c(=O)c2c(n(c1)Cc1ccccc1F)nc(cc2)C)N[C@H]1CC[C@H](C)CC1</chem>   | 913533-81-0 | 37.5  | 8.4  | 2006:908608 |
| <chem>O=C(c1c(=O)c2c(n(c1)Cc1ccccc1)nc(cc2)C)NC1CCCCC1</chem>               | 913533-82-1 | 143.2 | 5.1  | 2006:908608 |
| <chem>O=C(c1c(=O)c2c(n(c1)Cc1ccc(F)cc1)nc(cc2)C)NC1CCCCC1</chem>            | 913533-83-2 | 4.3   | 1    | 2006:908608 |
| <chem>O=C(c1c(=O)c2c(n(c1)Cc1ccccc1F)nc(cc2)C)NC1CCCCC1</chem>              | 913533-84-3 | 149.4 | 13.4 | 2006:908608 |
| <chem>O=C(c1c(=O)c2c(n(c1)Cc1ccccc1)nc(cc2)Cl)NC1CCCCC1</chem>              | 913533-85-4 | 463.6 | 24.6 | 2006:908608 |
| <chem>O=C(c1c(=O)c2c(n(c1)Cc1ccc(F)cc1)nc(cc2)Cl)NC1CCCCC1</chem>           | 913533-86-5 | 495   | 21.4 | 2006:908608 |
| <chem>O=C(c1c(=O)c2c(n(c1)Cc1ccccc1F)nc(cc2)Cl)NC1CCCCC1</chem>             | 913533-87-6 | 171.2 | 18.1 | 2006:908608 |
| <chem>O=C(c1c(=O)c2c(n(c1)CCc1ccccc1)nc(cc2)C)NC1CCCCC1</chem>              | 913533-89-8 | 1000  | 16.3 | 2006:908608 |
| <chem>O=C(c1c(=O)c2c(n(c1)Cc1ccc(OC)cc1)nc(cc2)C)NC1CCCCC1</chem>           | 913533-90-1 | 1000  | 35.8 | 2006:908608 |
| <chem>O=C(c1c(=O)c2c(n(c1)Cc1ccc(F)cc1)nc(cc2)C)NC1CCCCC1</chem>            | 913533-91-2 | 384.1 | 13   | 2006:908608 |
| <chem>O=C(c1c(=O)c2c(n(c1)Cc1ccccc1)nc(cc2)C)NC1CCCCC1</chem>               | 913533-92-3 | 1000  | 48.6 | 2006:908608 |
| <chem>O=C(c1c(=O)c2c(n(c1)CCN1CCOCC1)nc(cc2)C)NC1CCCCC1</chem>              | 913533-93-4 | 1000  | 67.2 | 2006:908608 |

## Supporting Information

|                                                                            |             |      |      |             |
|----------------------------------------------------------------------------|-------------|------|------|-------------|
| <chem>O=C(c1c(=O)c2c(n(c1)CCN1CCOCC1)nc(cc2)Cl)N[C@H]1CC[C@H](C)CC1</chem> | 913534-01-7 | 1000 | 40.5 | 2006:908608 |
| <chem>O=C(c1c(=O)c2c(n(c1)Cc1cccc1)cccc2)NC1CCCC1</chem>                   | 913534-04-0 | 1000 | 4.8  | 2006:908608 |
| <chem>O=C(c1c(=O)c2c(n(c1)CCN1CCOCC1)cc(cc2)Cl)NC1CCCC1</chem>             | 913534-05-1 | 1000 | 3.3  | 2006:908608 |
| <chem>O=C(c1cccc2c1cccc2)c1cc(c2cccc2)n(CCC)c1</chem>                      | 914458-17-6 | 404  | 104  | 2006:934979 |
| <chem>O=C(c1cc(c2cccc2)n(CCCC)c1)c1cccc2c1cccc2</chem>                     | 914458-18-7 | 60   | 15   | 2006:934979 |
| <chem>O=C(c1cccc2c1cccc2)c1cc(c2cccc2)n(CCCCC)c1</chem>                    | 914458-19-8 | 14   | 6.4  | 2006:934979 |
| <chem>O=C(c1cc(c2cccc2)n(CCCCC)c1)c1cccc2c1cccc2</chem>                    | 914458-20-1 | 11   | 7.1  | 2006:934979 |
| <chem>O=C(c1cc(c2cccc2)n(CCCCC)c1)c1cccc2c1cccc2</chem>                    | 914458-21-2 | 21   | 62   | 2006:934979 |
| <chem>O=C(c1cc(c2cccc2C)n(CCCCC)c1)c1cccc2c1cccc2</chem>                   | 914458-22-3 | 5.6  | 4    | 2006:934979 |
| <chem>O=C(c1cc(c2cccc2CC)n(CCCCC)c1)c1cccc2c1cccc2</chem>                  | 914458-23-4 | 17   | 3.4  | 2006:934979 |
| <chem>O=C(c1cc(c2cccc2CCCC)n(CCCCC)c1)c1cccc2c1cccc2</chem>                | 914458-24-5 | 60   | 69   | 2006:934979 |
| <chem>O=C(c1cc(c2cccc2OC)n(CCCCC)c1)c1cccc2c1cccc2</chem>                  | 914458-25-6 | 29   | 20   | 2006:934979 |
| <chem>O=C(c1cc(c2cccc2F)n(CCCCC)c1)c1cccc2c1cccc2</chem>                   | 914458-26-7 | 7.7  | 3.3  | 2006:934979 |
| <chem>O=C(c1cc(c2cccc2Cl)n(CCCCC)c1)c1cccc2c1cccc2</chem>                  | 914458-27-8 | 7.9  | 5.2  | 2006:934979 |
| <chem>O=C(c1cccc2c1cccc2)c1cc(c2cccc2C(F)(F)F)n(CCCCC)c1</chem>            | 914458-28-9 | 77   | 8.2  | 2006:934979 |
| <chem>O=C(c1cc(c2cccc(C)c2)n(CCCCC)c1)c1cccc2c1cccc2</chem>                | 914458-29-0 | 67   | 39   | 2006:934979 |
| <chem>O=C(c1cc(c2cccc(OC)c2)n(CCCCC)c1)c1cccc2c1cccc2</chem>               | 914458-30-3 | 53   | 23   | 2006:934979 |
| <chem>O=C(c1cc(c2cccc(F)c2)n(CCCCC)c1)c1cccc2c1cccc2</chem>                | 914458-31-4 | 16   | 9.1  | 2006:934979 |
| <chem>O=C(c1cc(c2cccc(Cl)c2)n(CCCCC)c1)c1cccc2c1cccc2</chem>               | 914458-32-5 | 70   | 16   | 2006:934979 |
| <chem>O=C(c1cccc2c1cccc2)c1cc(c2cccc(C(F)(F)F)c2)n(CCCCC)c1</chem>         | 914458-33-6 | 245  | 71   | 2006:934979 |
| <chem>O=C(c1cccc2c1cccc2)c1cc(c2cccc([N+](=O)[OH-])c2)n(CCCCC)c1</chem>    | 914458-34-7 | 100  | 41   | 2006:934979 |
| <chem>O=C(c1cc(c2ccc(C)c2)n(CCCCC)c1)c1cccc2c1cccc2</chem>                 | 914458-35-8 | 130  | 18   | 2006:934979 |
| <chem>O=C(c1cc(c2ccc(CC)cc2)n(CCCCC)c1)c1cccc2c1cccc2</chem>               | 914458-36-9 | 34   | 29   | 2006:934979 |
| <chem>O=C(c1cc(c2ccc(CCCC)cc2)n(CCCCC)c1)c1cccc2c1cccc2</chem>             | 914458-37-0 | 42   | 64   | 2006:934979 |
| <chem>O=C(c1cc(c2ccc(OC)cc2)n(CCCCC)c1)c1cccc2c1cccc2</chem>               | 914458-38-1 | 285  | 41   | 2006:934979 |
| <chem>O=C(c1cc(c2ccc(F)cc2)n(CCCCC)c1)c1cccc2c1cccc2</chem>                | 914458-39-2 | 41   | 33   | 2006:934979 |
| <chem>O=C(c1cc(c2ccc(Cl)cc2)n(CCCCC)c1)c1cccc2c1cccc2</chem>               | 914458-40-5 | 276  | 25   | 2006:934979 |
| <chem>O=C(c1cccc2c1cccc2)c1cc(c2ccc(C(F)(F)F)cc2)n(CCCCC)c1</chem>         | 914458-41-6 | 218  | 53   | 2006:934979 |

# Supporting Information

|                                                                                 |             |       |      |              |
|---------------------------------------------------------------------------------|-------------|-------|------|--------------|
| <chem>O=C(c1cccc2c1cccc2)c1cc(c2cccc3c2cccc3)n(CCCCC)c1</chem>                  | 914458-42-7 | 41    | 49   | 2006:934979  |
| <chem>O=C(c1cccc2c1cccc2)c1cc(c2ccc3cccc3c2)n(CCCCC)c1</chem>                   | 914458-43-8 | 333   | 169  | 2006:934979  |
| <chem>O=C(c1cccc2c1cccc2)c1cc(c2ccnc2)n(CCCCC)c1</chem>                         | 914458-44-9 | 191   | 24   | 2006:934979  |
| <chem>O=C(c1nn(c2ccc(Cl)cc2Cl)c2c1Cc1c2ccc(C)c1)NC1CCCC1</chem>                 | 919077-81-9 | 900   | 7.6  | 2006:1212215 |
| <chem>O=C(c1nn(c2ccc(Cl)cc2Cl)c2c1Cc1c2ccc(C)c1)Nc1cccc1</chem>                 | 919077-82-0 | 2409  | 32.8 | 2006:1212215 |
| <chem>O=C(c1nn(c2ccc(Cl)cc2Cl)c2c1Cc1c2ccc(C)c1)Nc1ccc(Cl)cc1</chem>            | 919077-83-1 | 10000 | 177  | 2006:1212215 |
| <chem>O=C(c1nn(c2ccc(Cl)cc2Cl)c2c1Cc1c2ccc(C)c1)Nc1ccc(F)cc1</chem>             | 919077-84-2 | 5000  | 61   | 2006:1212215 |
| <chem>O=C(c1nn(c2ccc(Cl)cc2Cl)c2c1Cc1c2ccc(C)c1)Nc1ccc(C)cc1</chem>             | 919077-85-3 | 5000  | 74   | 2006:1212215 |
| <chem>O=C(c1nn(c2ccc(Cl)cc2Cl)c2c1Cc1c2ccc(C)c1)Nc1ccc(OC)cc1</chem>            | 919077-87-5 | 10000 | 114  | 2006:1212215 |
| <chem>O=C(c1nn(c2ccc(Cl)cc2Cl)c2c1Cc1c2ccc(C)c1)Nc1ccc(Cl)cc1Cl</chem>          | 919077-89-7 | 2625  | 5000 | 2006:1212215 |
| <chem>O=C(c1nn(c2ccc(Cl)cc2Cl)c2c1Cc1c2ccc(C)c1)Nn1cccc1</chem>                 | 919077-90-0 | 2275  | 63   | 2006:1212215 |
| <chem>O=C(c1nn(c2ccc(Cl)cc2Cl)c2c1Cc1c2ccc(C)c1)Nn1ccc([N+](=O)[OH-])cc1</chem> | 919077-92-2 | 4500  | 2116 | 2006:1212215 |
| <chem>O=C(c1nn(c2ccc(Cl)cc2Cl)c2c1Cc1c2ccc(C)c1)Nn1ccc(OC)cc1</chem>            | 919077-93-3 | 5000  | 3000 | 2006:1212215 |
| <chem>O=C(c1nn(c2ccc(Cl)cc2Cl)c2c1Cc1c2cc(Cl)c(C)c1)NC1CCCC1</chem>             | 919077-94-4 | 833   | 25   | 2006:1212215 |
| <chem>O=C(c1nn(c2ccc(Cl)cc2Cl)c2c1Cc1c2cc(Cl)c(C)c1)NN1CCCC1</chem>             | 919077-95-5 | 916   | 200  | 2006:1212215 |
| <chem>O=C(c1nn(c2ccc(Cl)cc2Cl)c2c1Cc1c2cc(C)c(Cl)c1)NN1CCCC1</chem>             | 919077-96-6 | 1200  | 85   | 2006:1212215 |
| <chem>O=C1[C@@H]2[C@H](N(c3ccc(Cl)cc3Cl)C(=C2C)c2ccc(Cl)cc2)CCN1N1CCCC1</chem>  | 929199-32-6 | 2.2   | 1300 | 2007:81238   |
| <chem>O=C1[C@@H]2[C@H](N(c3ccc(Cl)cc3Cl)C(=C2C)c2ccc(Cl)cc2)CCN1C1CCCC1</chem>  | 929199-33-7 | 7.5   | 8300 | 2007:81238   |
| <chem>O=C1[C@@H]2[C@H](N(c3cccc3Cl)C(=C2C)c2ccc(Cl)cc2)CCN1N1CCCC1</chem>       | 929199-75-7 | 3.5   | 1100 | 2007:81238   |
| <chem>O=C1[C@@H]2[C@H](N(c3cccc3Cl)C(=C2C)c2ccc(OC)cc2)CCN1N1CCCC1</chem>       | 929199-76-8 | 20    | 850  | 2007:81238   |
| <chem>CCCC/C=C/C/C=C/C/C=C/C/C=C/C/CCCC(=O)NCCO</chem>                          | 94421-68-8  | 13    | 65   | 1998:635184  |
| <chem>O=C(NCCO)CCCCCCOc1cc(CCCCC)cc(O)c1</chem>                                 | 944395-58-8 | 130   | 390  | 2007:689135  |
| <chem>O=C(NC1CC1)CCCCCCOc1cc(CCCCC)cc(O)c1</chem>                               | 944395-59-9 | 16    | 39   | 2007:689135  |
| <chem>O=C(NCC1CC1)CCCCCCCCOc1cc(CCCCC)cc(O)c1</chem>                            | 944395-60-2 | 510   | 80   | 2007:689135  |
| <chem>O=C(NCc1ccc(OC)c(O)c1)CCCCCCCCOc1cc(CCCCC)cc(O)c1</chem>                  | 944395-62-4 | 2100  | 1650 | 2007:689135  |
| <chem>O=C(NCCO)CCCCCCCCOc1cc(CCCCC)cc(O)c1</chem>                               | 944395-63-5 | 60    | 39   | 2007:689135  |
| <chem>O=C(NC1CC1)CCCCCCCCOc1cc(CCCCC)cc(O)c1</chem>                             | 944395-64-6 | 750   | 310  | 2007:689135  |
| <chem>O=C(NCCO)CCCCCCOc1cc(O)ccc1CCCCC</chem>                                   | 944395-65-7 | 260   | 3940 | 2007:689135  |



## Supporting Information

|                                                                  |             |      |      |             |
|------------------------------------------------------------------|-------------|------|------|-------------|
| <chem>O=C(NC1CC1)CCCCCOCc1cc(O)ccc1CCCCC</chem>                  | 944395-66-8 | 310  | 1800 | 2007:689135 |
| <chem>O=C(NCC1CC1)CCCCCCCCOCc1cc(O)ccc1CCCCC</chem>              | 944395-67-9 | 750  | 470  | 2007:689135 |
| <chem>O=C(NCCc1ccc(O)c(O)c1)CCCCCCCCOCc1cc(O)ccc1CCCCC</chem>    | 944395-68-0 | 2100 | 7900 | 2007:689135 |
| <chem>O=C(NCc1ccc(OC)c(O)c1)CCCCCCCCOCc1cc(O)ccc1CCCCC</chem>    | 944395-69-1 | 2820 | 2100 | 2007:689135 |
| <chem>O=C(NCCO)CCCCCCCCOCc1cc(O)ccc1CCCCC</chem>                 | 944395-70-4 | 170  | 1420 | 2007:689135 |
| <chem>O=C(NC1CC1)CCCCCCCCOCc1cc(O)ccc1CCCCC</chem>               | 944395-71-5 | 13   | 39   | 2007:689135 |
| <chem>O=C(NCCO)CCCCCOCc1ccc(CCCCC)c(O)c1</chem>                  | 944395-72-6 | 190  | 2400 | 2007:689135 |
| <chem>O=C(NC1CC1)CCCCCOCc1ccc(CCCCC)c(O)c1</chem>                | 944395-73-7 | 56   | 280  | 2007:689135 |
| <chem>Nc1cc(C(C)(C)CCCC)ccc1c1cc(C)cc(C)c1</chem>                | 946004-33-7 | 80   | 51   | 2007:652168 |
| <chem>O=C(c1cc(C(C)(C)CCCC)ccc1c1cc(C)cc(C)c1)OC</chem>          | 946004-34-8 | 230  | 110  | 2007:652168 |
| <chem>O=C(c1cc(C(C)(C)CCCC)ccc1c1cc(C)cc(C)c1)N</chem>           | 946004-35-9 | 370  | 320  | 2007:652168 |
| <chem>OCc1cc(C(C)(C)CCCC)ccc1c1cc(C)cc(C)c1</chem>               | 946004-37-1 | 360  | 480  | 2007:652168 |
| <chem>NCCc1cc(C(C)(C)CCCC)ccc1c1cc(C)cc(C)c1</chem>              | 946004-38-2 | 1500 | 380  | 2007:652168 |
| <chem>O=C(OCc1cc(C(C)(C)CCCC)ccc1c1cc(C)cc(C)c1)CN1CCOCC1</chem> | 946004-40-6 | 370  | 0.81 | 2007:652168 |
| <chem>Cc1cc(c2ccc(C(C)(C)CCCC)cc2CN2CCOCC2)cc(C)c1</chem>        | 946004-41-7 | 3900 | 660  | 2007:652168 |
| <chem>Oc1cc(C2(CCCCC)CC2)ccc1c1cc(C)cc(C)c1</chem>               | 946004-42-8 | 13   | 55   | 2007:652168 |
| <chem>Oc1cc(C2(CCCCC)CC2)ccc1c1cc(C)cc(C)c1</chem>               | 946004-43-9 | 2.9  | 5.5  | 2007:652168 |
| <chem>Oc1cc(C2(CCCCC)CC2)ccc1c1cc(C)cc(C)c1</chem>               | 946004-44-0 | 1.8  | 1.7  | 2007:652168 |
| <chem>CC(c1cc(O)c(c2cc(C)cc(C)c2)cc1)(C(=O)OC)C</chem>           | 946004-46-2 | 160  | 16   | 2007:652168 |
| <chem>CC(c1cc(O)c(c2cc(C)cc(C)c2)cc1)(CCC(=O)OC)C</chem>         | 946004-47-3 | 120  | 5.6  | 2007:652168 |
| <chem>CC(c1cc(O)c(c2cc(C)cc(C)c2)cc1)(CCCC(=O)OC)C</chem>        | 946004-48-4 | 24   | 14   | 2007:652168 |
| <chem>CC(c1cc(O)c(c2cc(C)cc(C)c2)cc1)(CO)C</chem>                | 946004-49-5 | 2200 | 600  | 2007:652168 |
| <chem>CC(c1cc(O)c(c2cc(C)cc(C)c2)cc1)(CCCO)C</chem>              | 946004-50-8 | 1100 | 56   | 2007:652168 |
| <chem>CC(c1cc(O)c(c2cc(C)cc(C)c2)cc1)(CCCCO)C</chem>             | 946004-51-9 | 39   | 3.6  | 2007:652168 |
| <chem>CC(c1cc(O)c(c2cc(C)cc(C)c2)cc1)(CCC(=O)NC)C</chem>         | 946004-56-4 | 840  | 140  | 2007:652168 |
| <chem>CC(c1cc(O)c(c2cc(C)cc(C)c2)cc1)(CCCC(=O)NC)C</chem>        | 946004-57-5 | 96   | 39   | 2007:652168 |
| <chem>Oc1cc(C(C)(C)CCCC)ccc1c1c(C)cccc1C</chem>                  | 946004-58-6 | 1.7  | 18   | 2007:652168 |
| <chem>Oc1cc(C(C)(C)CCCC)ccc1c1cc(C)ccc1C</chem>                  | 946004-59-7 | 4.6  | 6.6  | 2007:652168 |

## Supporting Information

|                                                                             |             |       |       |             |
|-----------------------------------------------------------------------------|-------------|-------|-------|-------------|
| <chem>Oc1cc(C(C)(C)CCCCC)ccc1c1cccc(C)c1C</chem>                            | 946004-60-0 | 49    | 20    | 2007:652168 |
| <chem>Oc1cc(C(C)(C)CCCCC)ccc1c1ccc(C)(C)c1</chem>                           | 946004-61-1 | 600   | 830   | 2007:652168 |
| <chem>Oc1cc(C(C)(C)CCCCC)ccc1c1cccc1OC</chem>                               | 946004-62-2 | 1.7   | 1     | 2007:652168 |
| <chem>Oc1cc(C(C)(C)CCCCC)ccc1c1cccc(OC)c1OC</chem>                          | 946004-63-3 | 34    | 7.8   | 2007:652168 |
| <chem>Oc1cc(C(C)(C)CCCCC)ccc1c1cccc(OC)c1</chem>                            | 946004-64-4 | 91    | 580   | 2007:652168 |
| <chem>Oc1cc(C(C)(C)CCCCC)ccc1c1ccc(OC)c(OC)c1</chem>                        | 946004-65-5 | 1400  | 1700  | 2007:652168 |
| <chem>Oc1cc(C(C)(C)CCCCC)ccc1c1cccc1N</chem>                                | 946004-66-6 | 5.2   | 17    | 2007:652168 |
| <chem>Oc1cc(C(C)(C)CCCCC)ccc1c1cccc(N)c1</chem>                             | 946004-67-7 | 15    | 44    | 2007:652168 |
| <chem>Oc1cc(C(C)(C)CCCCC)ccc1c1ccc(N)cc1</chem>                             | 946004-68-8 | 320   | 1000  | 2007:652168 |
| <chem>N#Cc1cccc(c2ccc(C(C)(C)CCCCC)cc2O)c1</chem>                           | 946004-69-9 | 27    | 45    | 2007:652168 |
| <chem>O=C(c1cc(O)c(c2cc(C)cc(C)c2)c(O)c1)OCCCC</chem>                       | 949009-91-0 | 2000  | 1100  | 2007:862454 |
| <chem>O=C(c1cc(OC)c(c2cc(C)cc(C)c2)c(O)c1)OCCCC</chem>                      | 949009-92-1 | 1400  | 270   | 2007:862454 |
| <chem>O=C(c1cc(O)c(c2cccc2)c(O)c1)OCCCC</chem>                              | 949009-94-3 | 10000 | 4000  | 2007:862454 |
| <chem>O=C(c1cc(O)c(c2cc(C)cc(C)c2)c(O)c1)OCCCC</chem>                       | 949009-95-4 | 2600  | 3200  | 2007:862454 |
| <chem>O=C(c1cc(O)c(c2cc(C)cc(C)c2)c(O)c1)OC</chem>                          | 949009-96-5 | 10000 | 4500  | 2007:862454 |
| <chem>O=C(c1cc(OC)c(c2cc(C)cc(C)c2)c(O)c1)OC</chem>                         | 949009-97-6 | 10000 | 6400  | 2007:862454 |
| <chem>Oc1c2[C@@H]3[C@H](CCC(=C3)C)C(C)(C)Oc2cc(C2(CCCCC)CCC2)c1</chem>      | 951039-87-5 | 1.5   | 11.5  | 2007:841173 |
| <chem>Oc1c2[C@@H]3[C@H](CCC(=C3)C)C(C)(C)Oc2cc(C2(CCCCC)CCCC2)c1</chem>     | 951039-88-6 | 18.4  | 23.5  | 2007:841173 |
| <chem>Oc1c2[C@@H]3[C@H](CCC(=C3)C)C(C)(C)Oc2cc(C2(CCCCC)CC2)c1</chem>       | 951039-89-7 | 0.48  | 4.2   | 2007:841173 |
| <chem>Oc1c2[C@@H]3[C@H](CCC(=C3)C)C(C)(C)Oc2cc(C2(CCCCC)CCC2)c1</chem>      | 951039-90-0 | 2.7   | 52.3  | 2007:841173 |
| <chem>Oc1c2[C@@H]3[C@H](CCC(=C3)C)C(C)(C)Oc2cc(C2(CCCCC)CCCC2)c1</chem>     | 951039-91-1 | 9.9   | 45.5  | 2007:841173 |
| <chem>Oc1c2[C@@H]3[C@H](CCC(=C3)C)C(C)(C)Oc2cc(C2(CCCCC)CCCC2)c1</chem>     | 951039-92-2 | 13.6  | 143.3 | 2007:841173 |
| <chem>Oc1c2[C@@H]3[C@H](CCC(=C3)C)C(C)(C)Oc2cc(C2(/C=C\CCCC)CC2)c1</chem>   | 951039-99-9 | 1.5   | 1.7   | 2007:841173 |
| <chem>Oc1c2[C@@H]3[C@H](CCC(=C3)C)C(C)(C)Oc2cc(C2(/C=C\CCCC)CCC2)c1</chem>  | 951040-00-9 | 0.93  | 1.2   | 2007:841173 |
| <chem>Oc1c2[C@@H]3[C@H](CCC(=C3)C)C(C)(C)Oc2cc(C2(/C=C\CCCC)CCCC2)c1</chem> | 951040-01-0 | 0.72  | 1.8   | 2007:841173 |
| <chem>Oc1c2[C@@H]3[C@H](CCC(=C3)C)C(C)(C)Oc2cc(C2(/C=C\CCCC)CCCC2)c1</chem> | 951040-02-1 | 3.9   | 4.9   | 2007:841173 |
| <chem>Oc1c2[C@@H]3[C@H](CCC(=C3)C)C(C)(C)Oc2cc(C2(CCCCC)c1</chem>           | 951040-04-3 | 8.8   | 20.8  | 2007:841173 |
| <chem>Oc1c2[C@@H]3[C@H](CCC(=C3)C)C(C)(C)Oc2cc(C(C)(C)CCCC)c1</chem>        | 951040-05-4 | 0.9   | 1.4   | 2007:841173 |

## Supporting Information

|                                                                                   |             |      |      |              |
|-----------------------------------------------------------------------------------|-------------|------|------|--------------|
| <chem>Oc1c2[C@@H]3[C@H](CCC(=C3)C)C(C)(C)Oc2cc(C2(CCCCC)CC2)c1</chem>             | 951040-06-5 | 0.44 | 0.86 | 2007:841173  |
| <chem>Oc1c2[C@@H]3[C@H](CCC(=C3)C)C(C)(C)Oc2cc(C2(CCCCC)CCCC2)c1</chem>           | 951040-07-6 | 0.45 | 1.92 | 2007:841173  |
| <chem>O=C(c1ccc2n(S(=O)(=O)c3ccccc3)c3c(CN(C4CCCC4)C3)c2c1)N1CC[C@H](C)CC1</chem> | 959938-26-2 | 259  | 17.9 | 2007:1170520 |
| <chem>O=C(c1ccc2[nH]c3c(CN(C4CCCC4)C3)c2c1)N1CC[C@H](C)CC1</chem>                 | 959938-29-5 | 8000 | 4724 | 2007:1170520 |
| <chem>O=C(c1ccc2n(C)c3c(CN(C4CCCC4)C3)c2c1)N1CC[C@H](C)CC1</chem>                 | 959938-30-8 | 1811 | 84.7 | 2007:1170520 |
| <chem>O=C(c1ccc2n(CC=C)c3c(CN(C4CCCC4)C3)c2c1)N1CC[C@H](C)CC1</chem>              | 959938-31-9 | 695  | 23.3 | 2007:1170520 |
| <chem>O=C(c1ccc2n(Cc3ccccc3)c3c(CN(C4CCCC4)C3)c2c1)N1CC[C@H](C)CC1</chem>         | 959938-32-0 | 658  | 106  | 2007:1170520 |
| <chem>O=C(c1ccc2n(S(=O)(=O)C)c3c(CN(C4CCCC4)C3)c2c1)N1CC[C@H](C)CC1</chem>        | 959938-33-1 | 279  | 7.9  | 2007:1170520 |
| <chem>O=C(c1ccc2n(S(=O)(=O)CC)c3c(CN(C4CCCC4)C3)c2c1)N1CC[C@H](C)CC1</chem>       | 959938-34-2 | 66.3 | 7    | 2007:1170520 |
| <chem>O=C(c1ccc2n(S(=O)(=O)C(C)C)c3c(CN(C4CCCC4)C3)c2c1)N1CC[C@H](C)CC1</chem>    | 959938-35-3 | 150  | 4.2  | 2007:1170520 |
| <chem>O=C(c1ccc2n(S(=O)(=O)C3CC3)c3c(CN(C4CCCC4)C3)c2c1)N1CC[C@H](C)CC1</chem>    | 959938-36-4 | 137  | 9.4  | 2007:1170520 |
| <chem>O=C(c1ccc2n(S(=O)(=O)CCC)c3c(CN(C4CCCC4)C3)c2c1)N1CC[C@H](C)CC1</chem>      | 959938-37-5 | 195  | 22.3 | 2007:1170520 |
| <chem>CC(=O)n1c2c(CN(C3CCCC3)C2)c2c1ccc(c2)C(=O)N1CC[C@H](C)CC1</chem>            | 959938-38-6 | 2331 | 88.1 | 2007:1170520 |
| <chem>O=C(c1ccc2n(S(=O)(=O)CC)c3c(CN(C4CCCC4)C3)c2c1)N1CCCCC1</chem>              | 959938-39-7 | 818  | 17.5 | 2007:1170520 |
| <chem>O=C(c1ccc2n(S(=O)(=O)CC)c3c(CN(C4CCCC4)C3)c2c1)N1CC[C@H](F)CC1</chem>       | 959938-40-0 | 2914 | 44.2 | 2007:1170520 |
| <chem>O=C(c1ccc2n(S(=O)(=O)CC)c3c(CN(C4CCCC4)C3)c2c1)N1CCOCC1</chem>              | 959938-41-1 | 8000 | 308  | 2007:1170520 |
| <chem>O=C(c1ccc2n(S(=O)(=O)CC)c3c(CN(C4CCCC4)C3)c2c1)N1CC[C@H](OC)CC1</chem>      | 959938-42-2 | 2131 | 27.6 | 2007:1170520 |
| <chem>O=C(c1ccc2n(S(=O)(=O)CC)c3c(CN(C4CCCC4)C3)c2c1)N(C)C(C)C</chem>             | 959938-43-3 | 7222 | 107  | 2007:1170520 |
| <chem>O=C(c1ccc2n(S(=O)(=O)CC)c3c(CN(C4CCCC4)C3)c2c1)N(CCCC)C</chem>              | 959938-44-4 | 779  | 22.3 | 2007:1170520 |
| <chem>O=C(c1ccc2n(S(=O)(=O)CC)c3c(CN(C4CCCC4)C3)c2c1)N(C)CCC(C)C</chem>           | 959938-45-5 | 1473 | 38.1 | 2007:1170520 |
| <chem>O=C(c1ccc2n(S(=O)(=O)CC)c3c(CN([C@@H]4COCC4)C3)c2c1)N1CC[C@H](C)CC1</chem>  | 959938-46-6 | 973  | 27.8 | 2007:1170520 |
| <chem>O=C(c1ccc2n(S(=O)(=O)CC)c3c(CN(C4COCC4)C3)c2c1)N1CC[C@H](C)CC1</chem>       | 959938-47-7 | 3021 | 216  | 2007:1170520 |
| <chem>O=C(c1ccc2n(S(=O)(=O)CC)c3c(CN([C@@H]4CCCCO4)C3)c2c1)N1CC[C@H](C)CC1</chem> | 959938-48-8 | 6183 | 17.6 | 2007:1170520 |
| <chem>O=C(c1ccc2n(S(=O)(=O)CC)c3c(CN(CC=C)C3)c2c1)N1CC[C@H](C)CC1</chem>          | 959938-49-9 | 263  | 6.4  | 2007:1170520 |
| <chem>O=C(c1ccc2n(S(=O)(=O)CC)c3c(CN(C(C)C)C3)c2c1)N1CC[C@H](C)CC1</chem>         | 959938-50-2 | 418  | 8.9  | 2007:1170520 |
| <chem>O=C(c1ccc2n(S(=O)(=O)CC)c3c(CN(CCC)C3)c2c1)N1CC[C@H](C)CC1</chem>           | 959938-51-3 | 604  | 11.1 | 2007:1170520 |
| <chem>O=C(c1ccc2n(S(=O)(=O)CC)c3c(CN(CCCC)C3)c2c1)N1CC[C@H](C)CC1</chem>          | 959938-52-4 | 341  | 16.8 | 2007:1170520 |
| <chem>O=C(c1ccc2n(S(=O)(=O)CC)c3c(CN(CC4CC4)C3)c2c1)N1CC[C@H](C)CC1</chem>        | 959938-53-5 | 176  | 6.3  | 2007:1170520 |

## Supporting Information

|                                                                               |             |      |      |              |
|-------------------------------------------------------------------------------|-------------|------|------|--------------|
| <chem>O=C(c1ccc2n(S(=O)(=O)CC)c3c(CN(CC4CCCC4)C3)c2c1)N1CC[C@H](C)CC1</chem>  | 959938-54-6 | 339  | 935  | 2007:1170520 |
| <chem>O=C(c1ccc2n(S(=O)(=O)CC)c3c(CN(CCC4CCCC4)C3)c2c1)N1CC[C@H](C)CC1</chem> | 959938-55-7 | 2742 | 1982 | 2007:1170520 |
| <chem>O=C(c1ccc2n(S(=O)(=O)CC)c3c(CN(Cc4cccc4)C3)c2c1)N1CC[C@H](C)CC1</chem>  | 959938-56-8 | 1273 | 37   | 2007:1170520 |
| <chem>O=C(c1ccc2n(S(=O)(=O)CC)c3cn(C4CCCC4)cc3c2c1)N1CC[C@H](C)CC1</chem>     | 959938-57-9 | 66.3 | 7    | 2007:1170520 |
